# Supplementary material for: Increase in anthropogenic antibiotic resistance markers in water supplied by an overhead tank based-water distribution system
Source: Royal Society of Chemistry journal article supplement (doi:10.1039/d1ew00267h), 2021-01-01
Supplement: d1ew00267h1.pdf [file d1ew00267h1.pdf]

1  
2  
3  
4  
5  
6  
7  
8  
9  
10  
11  
12  
13  
14  
15  
16  
17  
18  
19  
20  
21  
22  
23

ELECTRONIC SUPPLEMENTARY MATERIAL

**Increase in anthropogenic antibiotic resistance markers in water supplied by overhead tank based-water distribution system**

**Section ESI.1 Prevalence of pathogens in building samples:**

The highest levels of DNA marker for *Legionella pneumophila*, *mip*, were detected in a newer building (Resid10-I) during both the monsoon and winter sampling event. During the summer sampling event, all the building samples and 16% of OHT samples had *mip* gene copies. During the monsoon sampling event, 66% of academic, 100% of administrative, 100% of recreational, and 75% of residential building samples, and 50% of OHT samples had *mip* gene copies. In winter, two building samples (Admin170-I and Resid10-I) had an order of magnitude higher levels of *mip* relative to the OHTs, suggesting growth of *L. pneumophila* within the DWDS (Fig. S12). During the winter sampling event, none of the academic, 33% of administrative, none of recreational, 8% of residential building samples, and none of the OHT samples had *mip* gene copies. Among the samples collected in winter, none of the OHT samples and few building samples had the DNA marker for *Mycobacterium avium* (Admin170-I, Resid170-I, Acad60-I and II, Resid60-II, Resid10-I, Rec10-I, and Acad10-I, Fig. S13). In summer, four out of six OHT samples, and building sample from 77% of academic, 66% of administrative, 66% of recreational, and 66% of residential buildings had the DNA marker for *M. avium* (Fig. 4). In monsoon, one OHT sample had the DNA marker for *M. avium* in contrast to the 33% of academic, 33% of administrative, 66% of recreational, and 58% of residential building samples.

24 **Section ESI.2 Physicochemical parameters and their correlation with the total bacterial**  
25 **count, ARGs, and opportunistic pathogens:**

26 In summer, the highest levels of iron (>500 ppb) were found in two buildings (Acad60-I and  
27 Resid60-II) and highest levels of Zn and Pb were found in Resid170-I (Table S5). In winter,  
28 the academic building, Acad60-I, had the highest level of Cu, Fe, and Pb. In monsoon, Cr  
29 levels were higher in Admin170-I, Acad60-I Rec10-I, and Acad10-I, whereas, Resid10-I had  
30 a higher level of Cu. Other metals such Pb and Zn were higher in Rec10-I and Acad10-I,  
31 respectively.

32 Total bacterial count, as indicated by the levels of 16S rRNA gene copies, in building  
33 samples for buildings that were <10 years old correlated positively (Spearman's rank  
34 correlation) with nitrate (p-value = 0.002, r = 0.56), turbidity (p-value = 0.021, r = 0.44), Cu  
35 (p-value = 0.005, r = 0.52), and Pb (p-value = 0.011, r = 0.48). Whereas, in buildings that  
36 were 50-60 years old, Zn (p-value = 0.008, r = 0.42), Cu (p-value <0.01, r = 0.63), and Pb (p-  
37 value = 0.03, r = 0.35) were positively correlated with total bacterial count. For the buildings  
38 >170 years old, turbidity (p-value = 0.05, r = 0.46) and sulphate (p-value = 0.039, r = 0.49)  
39 positively correlated with the total bacterial count. The levels of iron, lead, and chromium in  
40 building samples from building that are >170 years old were statistically positively correlated  
41 with the levels of *mip* gene copies (p-value = 0.002, r = 0.67 for Fe, p-value = 0.0001, r =  
42 0.77 for Pb, p-value = 0.0002, r = 0.76 for Cr; Spearman's rank correlation). Only Fe levels  
43 were statistically significantly and positively correlated with DNA marker for *M. avium* in  
44 <10 years old buildings (p-value = 0.01, r = 0.44, Spearman's rank correlation).

45 Overall, heavy metals (Fe, Pb, and Cr) and nitrate and pH were positively correlated to with  
46 *yccT* gene copies. The levels of sulphate were negatively correlated with the levels of *yccT*  
47 gene copies (p-value = 0.05, r = -0.45754, Spearman's rank correlation) for buildings that  
48 were >170 years old. A similar trend was noticed in old buildings that were 50 – 60 years old:

49 the levels of *yccT* gene copies positively correlated with Fe (p-value = 0.03, r=0.36), Pb (p-  
50 value = 0.01, r= 0.39) and Cr (p=0.002, r=0.49), nitrate (p= 0.01, r= 0.42) and pH (p-value =  
51 0.04, r= 0.34). In case of new buildings (<10 years old), the levels of *yccT* gene copies  
52 positively correlated with Fe (p-value =0.05, r=0.37), Pb (p-value = 0.006, r= 0.51), Cr (p-  
53 value =0.0001, r=0.67), nitrate (p-value = 0.05, r= 0.38) and pH (p-value = 0.02, r= 0.42)  
54 (Spearman's rank correlation).

55 Overall, Zn, Cu, Pb and nitrate, pH and turbidity were correlated with the levels of *sul1* gene  
56 copies (p-value = 0.02, r = 0.22 for Zn, p-value = 0.0001, r = 0.37 for Cu, p-value < 0.01, r =  
57 0.41 for Pb, p-value = 0.001, r = 0.31 for nitrate, p-value = 0.01, r = 0.24 for pH, p-value =  
58 0.03, r = 0.24 for turbidity; Spearman's rank correlation). The highest increase in the levels of  
59 *intI1* gene copies was observed in two academic buildings (Acad60-I, Acad10-I) and one  
60 residential building (Resid10-I) during the summer sampling event and it correlated  
61 significantly with chloride levels (p-value = 0.03, r = 0.412; Spearman's rank coefficient)  
62 (Fig. 5).

### 63 **Section ESI.3 Effect of pipe length on water quality, antibiotic resistance gene, and class** 64 **1 integron-integrase gene**

65 In buildings that were >170 years, pipe length correlated with *sul1* (p-value= 0.01, r= 0.57)  
66 and *intI1* (p-value= 0.04, r= 0.46) and negatively correlated with turbidity (p-value= 0.01, r=  
67 -0.56) (Spearman's rank correlation coefficient). In buildings that were 50-60 years, pipe  
68 length correlated positively with nitrate (p-value= 0.001, r= 0.51) and sulphate (p-value=  
69 0.005, r= 0.45) and negatively with *intI1* (p-value= 0.02, r= -0.36) and pH (p-value< 0.001,  
70 r= -0.77). In buildings that were <10 years, pipe length correlated negatively with nitrate (p-  
71 value= 0.02, r= -0.42) (Spearman's rank correlation coefficient).

72 Table S1 Detailed information of the OHTs and buildings that were sampled

| Overhead-Tanks |                      |               |                                  | Buildings  |                        |                |                                                       |                        |                            |
|----------------|----------------------|---------------|----------------------------------|------------|------------------------|----------------|-------------------------------------------------------|------------------------|----------------------------|
| Identity*      | Year of construction | Capacity (KL) | Pipe length from nearest tap (m) | Identity*  | Building age           | Type           | Typical number of residents for residential buildings | Pipe and tap materials | Pipe length from OHT** (m) |
| OHT1           | 1982                 | 525           | ~35                              | Admin170-I | Very old               | Administration |                                                       | CI+GI                  | ~400                       |
| OHT2           | 1982                 | 500           | ~45                              | Resid170-I | buildings (>170 years) | Residential    | 4-6                                                   |                        | ~250                       |
| OHT3           | 2007                 | 500           | ~60                              | Acad60-I   | Old                    | Academics      |                                                       | CI+GI                  | ~400                       |
| OHT4           | 2011                 | 525           | ~230                             | Acad60-II  | buildings              |                |                                                       |                        | ~400                       |
| OHT5           | 2014                 | 500           | ~35                              | Resid60-I  | (50-60                 | Residential    | 4-6                                                   |                        | ~450                       |
| OHT6           | 2014                 | 500           | ~40                              | Resid60-II | years)                 |                |                                                       |                        | ~700                       |
|                |                      |               |                                  | Rec10-I    | New                    | Recreational   |                                                       | GI & CP                | ~600                       |

|           |                |             |     |               |      |
|-----------|----------------|-------------|-----|---------------|------|
| Acad10-I  | buildings      | Academics   |     | brass+        | ~420 |
| Resid10-I | (<10<br>years) | Residential | 2-4 | UPVC+<br>CPVC | ~500 |

73

74 \*In case of OHTs, the suffixed numbers represent each of the 6 different targeted OHTs. In case of buildings, the prefixes – Acad, Resid, and  
75 Admin – represent the space utilization of the buildings: Academic, Residential, and Administrative work respectively. The number that follows  
76 the space utilization prefix represents the building age to the nearest decade. The suffixes – I, II – are the index number for each of the buildings  
77 within the same space utilization and building age category. Pipe materials – CI= cast iron, GI= galvanized iron, CP brass= chrome plated brass,  
78 UPVC= unplasticized polyvinyl chloride, CPVC= chlorinated polyvinyl chloride. Summer (water temperature range: 24°C – 26°C; ambient  
79 temperature range: 28°C – 34°C, relative humidity: 30%-35%), winter (water temperature range: 16°C – 18°C; ambient temperature range: 6°C  
80 – 11°C, relative humidity: 60%-62%), and monsoon (water temperature range: 23°C – 25°C; ambient temperature range: 25°C – 30°C, relative  
81 humidity: 80%-95%).

82 \*\*The pipe length was calculated using the construction drawing of the DWDS (Fig. S1), and the estimates are accurate upto 3 m.

83

84

85

86 Table S2 Primer sequences for the qPCR to target select pathogens and genetic markers

| Targeted genes/ ARGs/<br>pathogens* | Primer sequence                  | References | Analytical LOQ<br>(GC/ $\mu$ L) |
|-------------------------------------|----------------------------------|------------|---------------------------------|
| 16S rRNA                            | 5'- CGGTGAATACGTTTCYCGG- 3'      | 1          | 1000                            |
|                                     | 5'- GGWTACCTTGTTACGACTT- 3'      |            |                                 |
| <i>sul1</i>                         | 5'- CGCACCGGAAACATCGCTGCAC- 3'   | 2          | 10                              |
|                                     | 5'- TGAAGTTCCGCCGCAAGGCTCG- 3'   |            |                                 |
| <i>sul2</i>                         | 5'- GAATAAATCGCTCATCATTTTCGG- 3' | 2          | 100                             |
|                                     | 5'- CGAATTCTTGCGGTTTCTTTCAGC- 3' |            |                                 |
| <i>blaOXA-1</i>                     | 5'-CAAGCCAAAGGCACGATAGT- 3'      | 3          | 10                              |
|                                     | 5'-ACGATTGCCTCCCTCTTGAA- 3'      |            |                                 |
| <i>ermF</i>                         | 5'-CGACACAGCTTTGGTTGAAC-3'       | 4          | 10                              |
|                                     | 5'-GGACCTACCTCATAGACAAG-3'       |            |                                 |
| <i>int11</i>                        | 5'-GGGTCAAGGATCTGGATTTCG-3'      | 2          | 10                              |
|                                     | 5'-ACATGCGTGTAATCATCGTCG-3'      |            |                                 |
| <i>L. pneumophila (mip)</i>         | 5'-AAAGGCATGCAAGACGCTATG-3'      | 5          | 10                              |

5'-GAAACTTGTTAAGAACGTCTTTCATTTG-3'

Probe: FAM-TGGCGCTCAATTGGCTTTAACCGA-BHQ

*M. avium* (16S rRNA gene)

5'-AGAGTTTGATCCTGGCTCAG-3'

5

10

5'-ACCAGAAGACATGCGTCTTG-3'

*E. coli* (*yccT*)

5'-GCATCGTGACCACCTTGA-3'

6

1000

5'-CAGCGTGGTGGCAAAA-3'

---

87 \* The annealing temperature for all reactions was 60°C. The overall qPCR assay contained DNA sample, the forward and reverse primers  
88 (500nM), PowerUp™ SYBR™ Green Master Mix (Applied Biosystems, USA) and molecular biology grade water. The total volume of all the  
89 qPCR reactions was 7µL and the qPCR was done using the Rotor-Gene Q® (Qiagen®, Hilden, Germany). The amplification efficiency ranged  
90 from 80% to 110% and the correlation coefficient of the standard curve 0.95 to 0.99.





92 **Table S4 Values of pH, conductivity and turbidity in OHT and building samples collected over three seasons**

| Sample ID*         | Summer |                                               |                    | Monsoon |                                               |                    | Winter |                                               |                    |
|--------------------|--------|-----------------------------------------------|--------------------|---------|-----------------------------------------------|--------------------|--------|-----------------------------------------------|--------------------|
|                    | pH     | Conductivity<br>( $\mu\text{S}/\text{cm}^2$ ) | Turbidity<br>(NTU) | pH      | Conductivity<br>( $\mu\text{S}/\text{cm}^2$ ) | Turbidity<br>(NTU) | pH     | Conductivity<br>( $\mu\text{S}/\text{cm}^2$ ) | Turbidity<br>(NTU) |
| <b>OHT1</b>        | 8.04   | 534                                           | 1.26               | 8.01    | 530                                           | 1.38               | 7.91   | 498                                           | 2.12               |
| <b>OHT2</b>        | 8.05   | 503                                           | 1.45               | 8.04    | 510                                           | 1.5                | 7.85   | 476                                           | 1.88               |
| <b>OHT3</b>        | 8.06   | 480                                           | 1.8                | 8.02    | 509                                           | 1.56               | 7.67   | 482                                           | 1.34               |
| <b>OHT4</b>        | 8.16   | 523                                           | 1.57               | 8.19    | 519                                           | 1.75               | 7.81   | 501                                           | 1.23               |
| <b>OHT5</b>        | 8.02   | 506                                           | 2.27               | 8.01    | 505                                           | 1.98               | 7.79   | 500                                           | 1.56               |
| <b>OHT6</b>        | 8.07   | 628                                           | 1.8                | 8.09    | 573                                           | 1.76               | 7.85   | 510                                           | 1.77               |
| <b>Admin170-Ia</b> | 8.01   | 491                                           | 2.86               | 8.05    | 612                                           | 1.95               | 8.03   | 515                                           | 3.21               |
| <b>Admin170-Ib</b> | 8.05   | 468                                           | 1.31               | 8.03    | 606                                           | 1.26               | 8.01   | 509                                           | 2.76               |
| <b>Admin170-Ic</b> | 8.04   | 461                                           | 2.06               | 8.08    | 578                                           | 1.87               | 8.06   | 511                                           | 2.29               |
| <b>Resid170-Ia</b> | 8.03   | 465                                           | 1.29               | 8.01    | 588                                           | 10.29              | 8.09   | 459                                           | 4.31               |
| <b>Resid170-Ib</b> | 8.06   | 472                                           | 15.3               | 8.04    | 576                                           | 5.44               | 8.11   | 487                                           | 3.83               |
| <b>Resid170-Ic</b> | 8.04   | 421                                           | 2.03               | 8.09    | 556                                           | 7.86               | 8.08   | 450                                           | 3.11               |

|                    |      |     |       |      |     |       |      |     |      |
|--------------------|------|-----|-------|------|-----|-------|------|-----|------|
| <b>Acad60-Ia</b>   | 8.02 | 504 | 4.24  | 8.05 | 600 | 8.6   | 8.04 | 491 | 3.69 |
| <b>Acad60-Ib</b>   | 7.97 | 483 | 14.1  | 8.03 | 604 | 12.03 | 8.03 | 494 | 4.3  |
| <b>Acad60-Ic</b>   | 8.05 | 502 | 2.52  | 8.06 | 601 | 4.25  | 8.05 | 491 | 3.81 |
| <b>Acad60-IIa</b>  | 8.12 | 566 | 2.03  | 8.09 | 631 | 5.2   | 8.09 | 543 | 2.42 |
| <b>Acad60-IIb</b>  | 8.16 | 523 | 3.25  | 8.17 | 628 | 7.4   | 8.15 | 539 | 2.09 |
| <b>Acad60-IIc</b>  | 8.3  | 525 | 0.987 | 8.23 | 611 | 2.65  | 8.12 | 523 | 1.29 |
| <b>Resid60-Ia</b>  | 7.62 | 503 | 3.01  | 8.01 | 559 | 1.78  | 7.59 | 512 | 2.76 |
| <b>Resid60-Ib</b>  | 7.78 | 522 | 1.25  | 8.01 | 541 | 2.3   | 7.99 | 509 | 1.02 |
| <b>Resid60-Ic</b>  | 7.89 | 533 | 0.931 | 8.02 | 545 | 2.08  | 7.84 | 511 | 2.11 |
| <b>Resid60-IIa</b> | 7.97 | 585 | 1.64  | 7.99 | 567 | 4.23  | 7.98 | 566 | 1.53 |
| <b>Resid60-IIb</b> | 7.96 | 602 | 9.83  | 7.81 | 585 | 2.98  | 7.91 | 587 | 3.12 |
| <b>Resid60-IIc</b> | 7.97 | 597 | 1.47  | 7.88 | 589 | 2.66  | 7.89 | 586 | 2.99 |
| <b>Resid10-Ia</b>  | 8.03 | 529 | 0.928 | 8.01 | 540 | 1.2   | 8.1  | 520 | 3.83 |
| <b>Resid10-Ib</b>  | 8.06 | 540 | 1.18  | 8.19 | 588 | 5.4   | 8.04 | 532 | 2.56 |
| <b>Resid10-Ic</b>  | 8.09 | 514 | 1.17  | 8.17 | 619 | 2.09  | 8.03 | 525 | 5.22 |
| <b>Rec10-Ia</b>    | 8.07 | 552 | 1.13  | 8.11 | 534 | 2.33  | 8.04 | 549 | 1.76 |

|                  |      |     |      |      |     |       |      |     |      |
|------------------|------|-----|------|------|-----|-------|------|-----|------|
| <b>Rec10-Ib</b>  | 8.02 | 542 | 1.39 | 8.13 | 567 | 2.1   | 8.01 | 541 | 1.51 |
| <b>Rec10-Ic</b>  | 8.06 | 550 | 2.41 | 8.11 | 565 | 2.57  | 8.06 | 547 | 1.88 |
| <b>Acad10-Ia</b> | 8.07 | 477 | 1.51 | 8.09 | 587 | 10.43 | 7.99 | 505 | 1.64 |
| <b>Acad10-Ib</b> | 8.09 | 498 | 1.65 | 8.05 | 610 | 9.11  | 7.96 | 520 | 1.95 |
| <b>Acad10-Ic</b> | 8.09 | 503 | 8.23 | 8.08 | 575 | 7.41  | 7.99 | 515 | 1.33 |

93 \*The prefixes are the OHT and building identities as enumerated in Table S1. The suffixes – a, b, c – represent the three different taps sampled  
94 from each building.

95

96 **Table S5 Values of anions (chloride, nitrate and sulphate) in the OHT and building samples collected over three seasons**

| Sample ID*  | Summer                    |                                        |                                        |      | Monsoon                   |                                        |                                        |             | Winter                    |                                        |                                        |             |
|-------------|---------------------------|----------------------------------------|----------------------------------------|------|---------------------------|----------------------------------------|----------------------------------------|-------------|---------------------------|----------------------------------------|----------------------------------------|-------------|
|             | Cl <sup>-</sup><br>(mg/L) | NO <sub>3</sub> <sup>-</sup><br>(mg/L) | SO <sub>4</sub> <sup>-</sup><br>(mg/L) | CSMR | Cl <sup>-</sup><br>(mg/L) | NO <sub>3</sub> <sup>-</sup><br>(mg/L) | SO <sub>4</sub> <sup>-</sup><br>(mg/L) | CSMR        | Cl <sup>-</sup><br>(mg/L) | NO <sub>3</sub> <sup>-</sup><br>(mg/L) | SO <sub>4</sub> <sup>-</sup><br>(mg/L) | CSMR        |
| <b>OHT1</b> | 11.12                     | 14.62                                  | 26.25                                  | 0.42 | 4.29                      | 1.34                                   | 5.22                                   | <b>0.82</b> | 8.92                      | 0.61                                   | 15.13                                  | <b>0.59</b> |
| <b>OHT2</b> | 10.21                     | 7.56                                   | 22.08                                  | 0.46 | 15.84                     | 16.16                                  | 28.23                                  | <b>0.56</b> | 13.86                     | 0.00                                   | 27.01                                  | <b>0.51</b> |
| <b>OHT3</b> | 3.88                      | 0.80                                   | 8.06                                   | 0.48 | 1.83                      | 0.00                                   | 3.58                                   | <b>0.51</b> | 2.33                      | 1.28                                   | 3.75                                   | <b>0.62</b> |

|                    |       |       |       |             |       |       |       |             |       |      |       |             |
|--------------------|-------|-------|-------|-------------|-------|-------|-------|-------------|-------|------|-------|-------------|
| <b>OHT4</b>        | 6.86  | 0.84  | 10.54 | <b>0.65</b> | 8.22  | 0.91  | 12.11 | <b>0.68</b> | 7.37  | 0.68 | 9.90  | <b>0.74</b> |
| <b>OHT5</b>        | 17.70 | 16.58 | 25.40 | <b>0.70</b> | 17.65 | 12.98 | 24.33 | <b>0.73</b> | 12.82 | 0.00 | 22.88 | <b>0.56</b> |
| <b>OHT6</b>        | 6.41  | 0.66  | 10.41 | <b>0.62</b> | 1.84  | 0.00  | 3.58  | <b>0.51</b> | 13.23 | 1.13 | 22.33 | <b>0.59</b> |
| <b>Admin170-Ia</b> | 2.54  | 0.86  | 4.31  | <b>0.59</b> | 9.38  | 11.93 | 23.11 | 0.41        | 3.39  | 0.96 | 9.83  | 0.35        |
| <b>Admin170-Ib</b> | 2.41  | 0.52  | 3.83  | <b>0.63</b> | 8.64  | 11.68 | 22.59 | 0.38        | 2.48  | 1.22 | 7.72  | 0.32        |
| <b>Admin170-Ic</b> | 2.20  | 0.52  | 3.46  | <b>0.64</b> | 6.76  | 0.50  | 18.18 | 0.37        | 2.59  | 1.21 | 8.05  | 0.32        |
| <b>Resid170-Ia</b> | 3.04  | 0.50  | 7.45  | 0.41        | 1.79  | 1.26  | 3.54  | <b>0.51</b> | 2.50  | 1.25 | 7.76  | 0.32        |
| <b>Resid170-Ib</b> | 3.30  | 1.28  | 7.61  | 0.43        | 1.90  | 1.27  | 3.55  | <b>0.54</b> | 3.86  | 1.08 | 8.80  | 0.44        |
| <b>Resid170-Ic</b> | 3.91  | 1.51  | 9.65  | 0.40        | 2.83  | 2.14  | 5.34  | <b>0.53</b> | 3.61  | 1.18 | 10.03 | 0.36        |
| <b>Acad60-Ia</b>   | 3.84  | 1.51  | 9.51  | 0.40        | 2.95  | 2.16  | 5.70  | <b>0.52</b> | 4.24  | 0.92 | 10.43 | 0.41        |
| <b>Acad60-Ib</b>   | 13.98 | 0.56  | 22.49 | <b>0.62</b> | 8.61  | 11.09 | 20.30 | 0.42        | 10.65 | 0.00 | 23.51 | 0.45        |
| <b>Acad60-Ic</b>   | 13.72 | 0.57  | 22.21 | <b>0.62</b> | 3.99  | 2.20  | 7.61  | <b>0.52</b> | 11.43 | 0.00 | 25.05 | 0.46        |
| <b>Acad60-IIa</b>  | 15.39 | 0.80  | 3.47  | <b>4.43</b> | 4.25  | 1.72  | 8.98  | 0.47        | 3.70  | 0.87 | 8.01  | 0.46        |
| <b>Acad60-IIb</b>  | 3.02  | 0.73  | 3.07  | <b>0.98</b> | 1.80  | 0.55  | 3.51  | <b>0.51</b> | 6.12  | 0.00 | 14.02 | 0.44        |
| <b>Acad60-IIc</b>  | 3.00  | 0.73  | 3.05  | <b>0.98</b> | 3.35  | 2.20  | 7.85  | 0.43        | 9.32  | 0.00 | 20.22 | 0.46        |
| <b>Resid60-Ia</b>  | 6.29  | 4.95  | 14.21 | 0.44        | 13.10 | 15.01 | 28.66 | 0.46        | 6.91  | 0.00 | 17.44 | 0.40        |

|                    |       |       |       |             |       |       |       |             |       |      |       |             |
|--------------------|-------|-------|-------|-------------|-------|-------|-------|-------------|-------|------|-------|-------------|
| <b>Resid60-Ib</b>  | 7.38  | 7.65  | 16.61 | 0.44        | 6.00  | 4.30  | 13.00 | 0.46        | 2.42  | 1.20 | 4.06  | <b>0.60</b> |
| <b>Resid60-Ic</b>  | 6.82  | 7.24  | 15.35 | 0.44        | 12.54 | 14.57 | 28.17 | 0.45        | 6.32  | 0.00 | 11.88 | <b>0.53</b> |
| <b>Resid60-IIa</b> | 13.04 | 14.08 | 22.91 | <b>0.57</b> | 12.40 | 11.57 | 23.56 | <b>0.53</b> | 2.12  | 1.24 | 8.80  | 0.24        |
| <b>Resid60-IIb</b> | 14.96 | 18.96 | 27.77 | <b>0.54</b> | 13.88 | 12.99 | 24.88 | <b>0.56</b> | 2.14  | 1.25 | 8.84  | 0.24        |
| <b>Resid60-IIc</b> | 13.93 | 16.13 | 25.09 | <b>0.56</b> | 13.74 | 12.92 | 25.55 | <b>0.54</b> | 7.81  | 0.00 | 15.97 | 0.49        |
| <b>Resid10-Ia</b>  | 11.33 | 12.67 | 9.68  | <b>1.17</b> | 13.13 | 11.68 | 24.60 | <b>0.53</b> | 2.95  | 1.20 | 10.56 | 0.28        |
| <b>Resid10-Ib</b>  | 11.26 | 10.57 | 8.66  | <b>1.30</b> | 13.18 | 11.75 | 24.68 | <b>0.53</b> | 2.24  | 1.19 | 8.17  | 0.27        |
| <b>Resid10-Ic</b>  | 9.30  | 8.48  | 7.55  | <b>1.23</b> | 13.42 | 12.18 | 25.01 | <b>0.54</b> | 2.58  | 1.20 | 9.16  | 0.28        |
| <b>Rec10-Ia</b>    | 5.45  | 0.56  | 16.19 | 0.34        | 12.37 | 0.00  | 22.09 | <b>0.56</b> | 12.71 | 0.00 | 20.72 | <b>0.61</b> |
| <b>Rec10-Ib</b>    | 4.96  | 0.57  | 16.17 | 0.31        | 13.36 | 0.00  | 24.73 | <b>0.54</b> | 6.87  | 1.08 | 12.86 | <b>0.53</b> |
| <b>Rec10-Ic</b>    | 4.56  | 0.60  | 14.96 | 0.30        | 12.60 | 0.00  | 22.67 | <b>0.56</b> | 9.49  | 1.17 | 17.33 | <b>0.55</b> |
| <b>Acad10-Ia</b>   | 6.16  | 2.89  | 21.28 | 0.29        | 10.46 | 9.58  | 22.48 | 0.47        | 12.99 | 0.00 | 21.55 | <b>0.60</b> |
| <b>Acad10-Ib</b>   | 7.13  | 6.83  | 21.15 | 0.34        | 10.38 | 9.47  | 22.47 | 0.46        | 12.82 | 0.00 | 21.30 | <b>0.60</b> |
| <b>Acad10-Ic</b>   | 7.00  | 4.67  | 18.68 | 0.37        | 10.45 | 9.29  | 22.77 | 0.46        | 2.54  | 1.15 | 4.29  | <b>0.59</b> |

97 \* The prefixes are the OHT and building identities as enumerated in Table S1. The suffixes – a, b, c – represent the three different taps sampled  
98 from each building. CSMR >0.5, indicating high corrosivity in water is highlighted in bold typeface.

99 Table S6 Values of heavy metals (Fe, Pb, Cu, Zn and Cr) in OHT and building samples collected over three seasons

| Sample ID*      | Summer         |               |              |              |              | Monsoon      |              |              |              |              | Winter       |              |              |              |              |
|-----------------|----------------|---------------|--------------|--------------|--------------|--------------|--------------|--------------|--------------|--------------|--------------|--------------|--------------|--------------|--------------|
|                 | Fe<br>(µg/L)   | Pb<br>(µg/L)  | Cu<br>(µg/L) | Zn<br>(µg/L) | Cr<br>(µg/L) | Fe<br>(µg/L) | Pb<br>(µg/L) | Cu<br>(µg/L) | Zn<br>(µg/L) | Cr<br>(µg/L) | Fe<br>(µg/L) | Pb<br>(µg/L) | Cu<br>(µg/L) | Zn<br>(µg/L) | Cr<br>(µg/L) |
| OHT1            | <b>340.644</b> | 5.469         | 1.353        | 33.894       | 6.553        | 18.788       | 0.947        | 1.596        | 156.26       | 1.241        | 3.408        | 5.079        | 1.397        | 225.93       | 0.565        |
| OHT2            | <b>338.913</b> | 7.274         | 0.854        | 10.05        | 5.877        | 14.376       | 0.261        | 1.945        | 22.269       | 0.995        | 29.912       | 1.959        | 0.795        | 8.457        | 0.786        |
| OHT3            | 266.303        | 5.063         | 0.638        | 20.076       | 5.882        | 49.828       | 1.519        | 2.644        | 13.945       | 0.678        | 2.967        | 0.279        | 0.856        | 5.852        | 0.565        |
| OHT4            | 294.514        | 5.294         | 1.938        | 11.783       | 5.849        | 97.997       | 1.908        | 2.835        | 34.838       | 0.409        | 22.503       | 0.972        | 4.192        | 231.15       | 1.346        |
| OHT5            | <b>371.035</b> | 6.413         | 1.01         | 2.83         | 6.256        | 28.042       | 0            | 1.74         | 9.085        | 1.743        | 257.31       | 4.073        | 2.92         | 7.768        | 0.767        |
| OHT6            | <b>356.821</b> | 7.39          | 3.263        | 15.791       | 7.434        | 1.23         | 0.445        | 7.52         | 78.254       | 1.877        | 149.26       | 1.448        | 8.458        | 33.516       | 0.593        |
| Admin170-<br>Ia | 253.927        | 6.498         | 3.141        | 10.778       | 6.758        | 27.627       | <b>13.12</b> | 19.249       | 514.71       | 1.717        | 4.309        | 0.269        | 5.021        | 37.981       | 0.854        |
| Admin170-<br>Ib | 248.757        | 8.117         | 6.59         | 256.753      | 7.202        | 32.358       | 6.461        | 4.288        | 507.87       | 2.147        | 23.6         | 1.393        | 3.182        | 37.323       | 0.653        |
| Admin170-       | 262.964        | <b>14.923</b> | 1.575        | 47.082       | 5.418        | 140.228      | 7.93         | 104.89       | 258.47       | 2.371        | 40.622       | 7.648        | 5.528        | 177.53       | 0.913        |

|            |                |               |        |         |       |              |              |        |        |       |        |       |       |        |       |
|------------|----------------|---------------|--------|---------|-------|--------------|--------------|--------|--------|-------|--------|-------|-------|--------|-------|
| Ic         |                |               |        |         |       |              |              |        |        |       |        |       |       |        |       |
| Resid170-  | 258.576        | <b>14.99</b>  | 5.486  | 606.459 | 5.557 | 14.691       | 8.754        | 8.459  | 457.81 | 0.862 | 13.409 | 0.777 | 1.408 | 23.669 | 0.6   |
| Ia         |                |               |        |         |       |              |              |        |        |       |        |       |       |        |       |
| Resid170-  | <b>306.746</b> | <b>14.37</b>  | 0.795  | 35.211  | 6.011 | 13.306       | 2.675        | 15.442 | 142.63 | 1.357 | 39.606 | 4.232 | 9.849 | 304.84 | 0.683 |
| Ib         |                |               |        |         |       |              |              |        |        |       |        |       |       |        |       |
| Resid170-  | <b>305.645</b> | <b>10.666</b> | 1.981  | 69.009  | 5.897 | 14.466       | 2.146        | 15.078 | 122.32 | 1.13  | 23.583 | 0.628 | 2.293 | 53.662 | 0.583 |
| Ic         |                |               |        |         |       |              |              |        |        |       |        |       |       |        |       |
| Acad60-Ia  | <b>425.584</b> | <b>15.248</b> | 20.059 | 194.598 | 5.895 | 61.89        | 1.71         | 4.105  | 162.92 | 0.387 | 34.227 | 1.228 | 3.502 | 285.47 | 0.641 |
| Acad60-Ib  | <b>507.51</b>  | <b>10.594</b> | 5.727  | 338.292 | 5.78  | 5.008        | 5.255        | 34.883 | 205.16 | 1.841 | 23.037 | 7.957 | 12.55 | 232.74 | 1.774 |
| Acad60-Ic  | 286.931        | <b>11.722</b> | 15.498 | 117.795 | 6.643 | 10.715       | 0.628        | 2.649  | 104.49 | 2.351 | 154.99 | 2.094 | 0.811 | 208.03 | 1.256 |
| Acad60-IIa | <b>338.172</b> | 8.617         | 1.569  | 170.617 | 6.939 | 139.895      | 7.2          | 72.711 | 272.23 | 1.002 | 6.454  | 0.279 | 1.932 | 37.003 | 0.607 |
| Acad60-IIb | <b>324.286</b> | 9.441         | 1.284  | 67.174  | 5.677 | 64.06        | 4.994        | 75.093 | 229.81 | 1.852 | 20.075 | 0.926 | 1.831 | 83.838 | 0.644 |
| Acad60-IIc | 285.531        | <b>11.174</b> | 1.894  | 52.394  | 5.665 | <b>306.3</b> | 9.817        | 14.328 | 380.65 | 0.88  | 36.942 | 1.326 | 1.68  | 49.211 | 0.822 |
| Resid60-Ia | <b>385.107</b> | 7.917         | 5.016  | 475.997 | 5.712 | 5.971        | <b>11.58</b> | 23.894 | 762.72 | 1.572 | 18.17  | 1.979 | 3.179 | 323.4  | 0.546 |
| Resid60-Ib | <b>317.104</b> | 4.846         | 0.756  | 124.329 | 6.226 | 5.305        | 2.123        | 29.721 | 115.26 | 1.548 | 45.872 | 0.931 | 1.94  | 97.841 | 0.689 |
| Resid60-Ic | <b>302.095</b> | 6.017         | 2.157  | 241.029 | 6.07  | 34.298       | 3.522        | 15.096 | 104.05 | 0.87  | 78.608 | 2.785 | 5.916 | 195.71 | 0.8   |

|             |                |               |       |         |       |                |              |        |        |       |        |       |       |        |       |
|-------------|----------------|---------------|-------|---------|-------|----------------|--------------|--------|--------|-------|--------|-------|-------|--------|-------|
| Resid60-IIa | <b>370.373</b> | 7.901         | 3.106 | 106.101 | 6.395 | 20.838         | 9.063        | 40.328 | 353.64 | 0.315 | 196.83 | 0.427 | 0.646 | 23.006 | 0.435 |
| Resid60-IIb | <b>884.805</b> | 8.207         | 2.334 | 14.477  | 6.078 | 22.718         | 0.013        | 1.296  | 19.748 | 1.602 | 152.17 | 0.266 | 0.536 | 38.687 | 0.478 |
| Resid60-IIc | <b>411.453</b> | <b>11.653</b> | 2.734 | 94.701  | 6.069 | 26.521         | 0.503        | 11.87  | 86.542 | 0.659 | 98.964 | 0.865 | 0.903 | 6.169  | 0.48  |
| Resid10-Ia  | <b>302.423</b> | 6.327         | 7.38  | 35.804  | 4.718 | 16.929         | <b>11.33</b> | 114.6  | 164.73 | 1.422 | 62.629 | 3.584 | 3.328 | 16.84  | 0.874 |
| Resid10-Ib  | <b>314.38</b>  | 5.949         | 4.725 | 40.59   | 5.43  | 30.537         | 8.458        | 77.193 | 127.73 | 0.591 | 60.053 | 0.417 | 2.841 | 15.283 | 0.4   |
| Resid10-Ic  | <b>305.651</b> | 9.703         | 6.458 | 34.052  | 5.753 | 22.706         | 4.786        | 59.564 | 246.14 | 2.111 | 152.58 | 1.335 | 9.94  | 25.548 | 1.285 |
| Rec10-Ia    | <b>311.722</b> | 7.771         | 5.959 | 128.221 | 6.491 | <b>1410.65</b> | <b>16.1</b>  | 7.926  | 1630.3 | 0.527 | 42.012 | 3.575 | 1.616 | 311.42 | 1.485 |
| Rec10-Ib    | <b>306.467</b> | 8.116         | 2.439 | 231.69  | 6.257 | 17.693         | <b>90.75</b> | 148.05 | 640.43 | 2.406 | 34.29  | 1.758 | 2.417 | 281.64 | 0.676 |
| Rec10-Ic    | <b>336.992</b> | 4.944         | 2.333 | 107.33  | 5.857 | 10.423         | <b>25.63</b> | 333.88 | 716.92 | 0.357 | 47.808 | 3.649 | 3.611 | 349.51 | 0.786 |
| Acad10-Ia   | <b>323.102</b> | 5.021         | 4.742 | 305.282 | 5.67  | <b>643.1</b>   | <b>18.92</b> | 69.832 | 2283.1 | 1.278 | 3.373  | 0.681 | 1.38  | 11.527 | 0.832 |
| Acad10-Ib   | <b>302.239</b> | 8.899         | 1.535 | 100.049 | 3.733 | 19.639         | <b>17.48</b> | 33.394 | 312.1  | 1.956 | 3.822  | 3.304 | 1.264 | 11.527 | 0.734 |
| Acad10-Ic   | <b>441.286</b> | <b>12.649</b> | 1.782 | 317.351 | 5.9   | 135.375        | <b>46.64</b> | 161.32 | 2137.9 | 2.193 | 3.114  | 0.129 | 2.384 | 5.526  | 0.878 |

100 \* The prefixes are the identities of the OHTs and buildings as enumerated in Table S1. The suffixes – a, b, c – represent the three different taps

101 sampled from each building

102 When the levels of any heavy metal exceeded the WHO<sup>7</sup> standards and BIS<sup>8</sup> the values are written in bold typeface.



104 **Table S7 Values of total organic carbon (mg/L) in OHT and building samples collected**

105 **over two seasons**

| <b>Sample ID*</b> | <b>Monsoon</b> | <b>Winter</b> |
|-------------------|----------------|---------------|
| OHT1              | 4.265          | 10.15         |
| OHT2              | 7.95           | 10.5          |
| OHT3              | 7.15           | 10.05         |
| OHT4              | 5.9            | 9.35          |
| OHT5              | 7.35           | 12.35         |
| OHT6              | 5.95           | 11            |
| Admin170-Ia       | 6.4            | 7.55          |
| Admin170-Ib       | 5.95           | 10.3          |
| Admin170-Ic       | 5.55           | 10.6          |
| Resid170-Ia       | 6.4            | 11.8          |
| Resid170-Ib       | 6.25           | 9.85          |
| Resid170-Ic       | 8.15           | 10.25         |
| Acad60-Ia         | 7.1            | 9.85          |
| Acad60-Ib         | 5.2            | 9.35          |
| Acad60-Ic         | 6.2            | 10.5          |
| Acad60-IIa        | 7.1            | 10.85         |
| Acad60-IIb        | 5.85           | 10.6          |
| Acad60-IIc        | 5.75           | 11.1          |
| Resid60-Ia        | 6.45           | 12.3          |
| Resid60-Ib        | 6.2            | 12.95         |

|             |      |       |
|-------------|------|-------|
| Resid60-Ic  | 7.85 | 11.7  |
| Resid60-IIa | 8.5  | 10.4  |
| Resid60-IIb | 7.1  | 11    |
| Resid60-IIc | 6.65 | 10.2  |
| Resid10-Ia  | 6.3  | 9.5   |
| Resid10-Ib  | 6.45 | 11.25 |
| Resid10-Ic  | 8.7  | 12.1  |
| Rec10-Ia    | 10.4 | 19.8  |
| Rec10-Ib    | 8.7  | 16.4  |
| Rec10-Ic    | 8.15 | 9.65  |
| Acad10-Ia   | 8.25 | 5.5   |
| Acad10-Ib   | 8.2  | 4.456 |
| Acad10-Ic   | 8.6  | 5.95  |

106 \* The prefixes are the OHT and building identities as enumerated in Table S1. The suffixes –  
107 a, b, c – represent the three different taps sampled from each building.



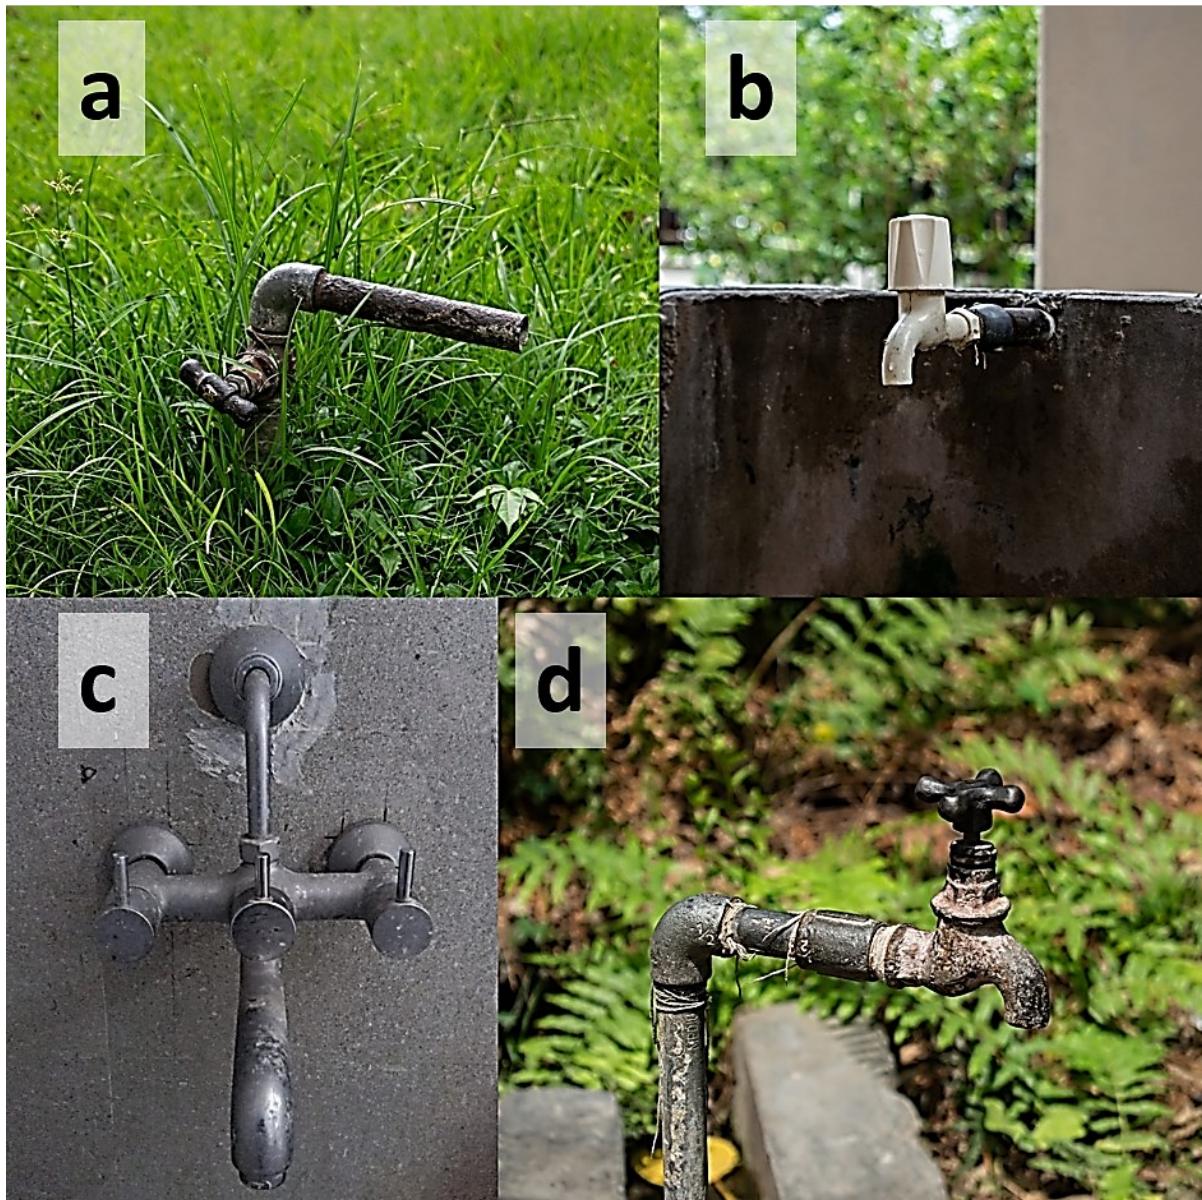

115

116 **Fig. S2: Different kinds of pipe and fixture materials used in the OHT-based DWDS. a.**

117 Galvanized iron pipe and fixture; **b.** Galvanized iron pipe and PVC fixture, **c.** Galvanized

118 iron pipe with chromium-plated brass fixtures; and **d.** Galvanized iron pipe with cast iron

119 fixture. Cast iron taps and pipes are not uncommon in the residential campus targeted in this

120 research, even as chromium-plated brass and galvanized iron were also used in some

121 buildings.

122

123

124

125

126

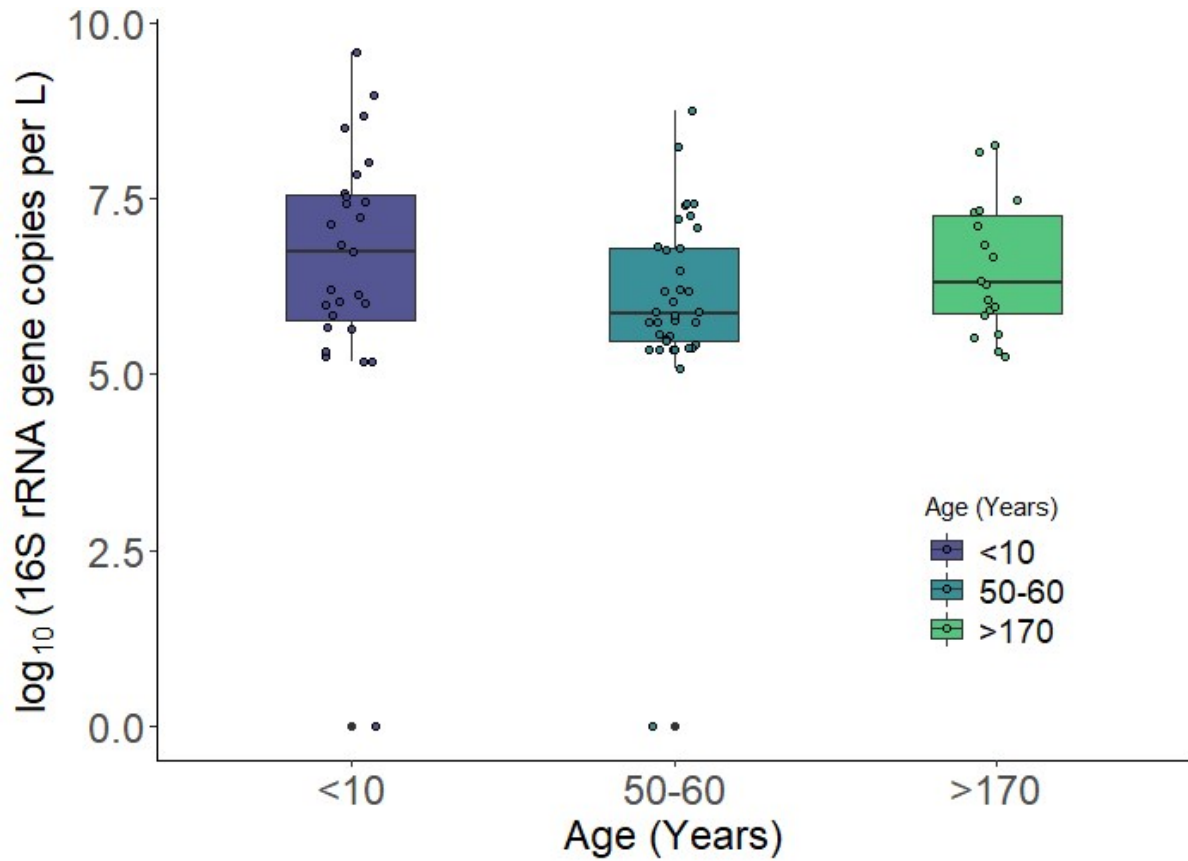

127

128 **Fig. S3. Total bacterial count in building tap water samples.** The y-axis represents 16S

129 rRNA gene copies per L of sampled water on log10 scale. The x-axis represents building

130 samples (n=81) that were collected from three building age groups (<10 years, 50-60 years,

131 >170 years).



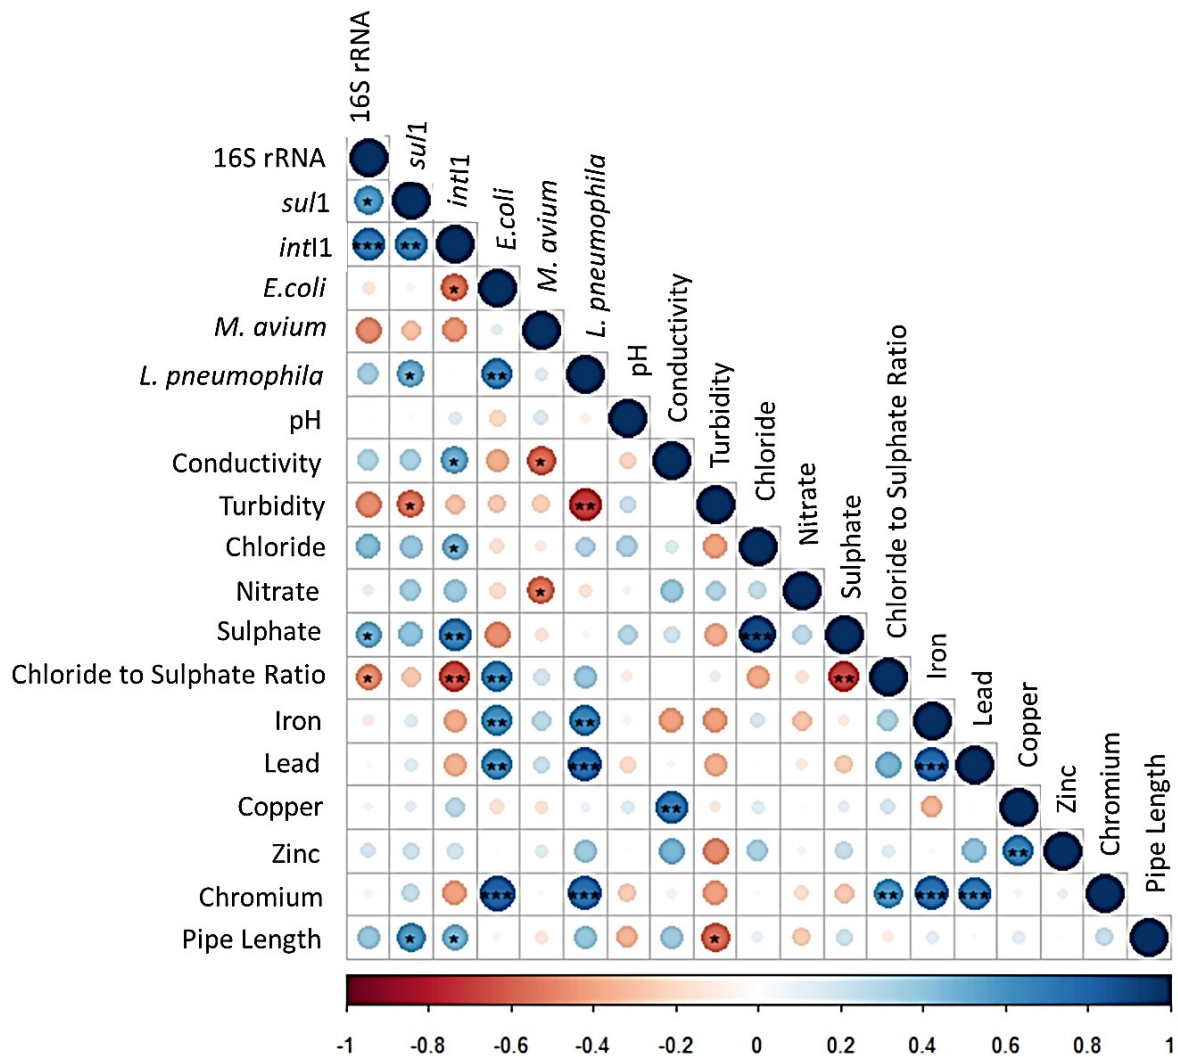

132

133 **Fig. S4.** Correlogram of Spearman's rank correlation coefficients computed between the  
 134 levels of targeted genes and physicochemical parameters in all samples from buildings that  
 135 were >170 years (\*: P-value < 0.05, \*\*: P-value < 0.01, \*\*\*: P-value < 0.001)

136

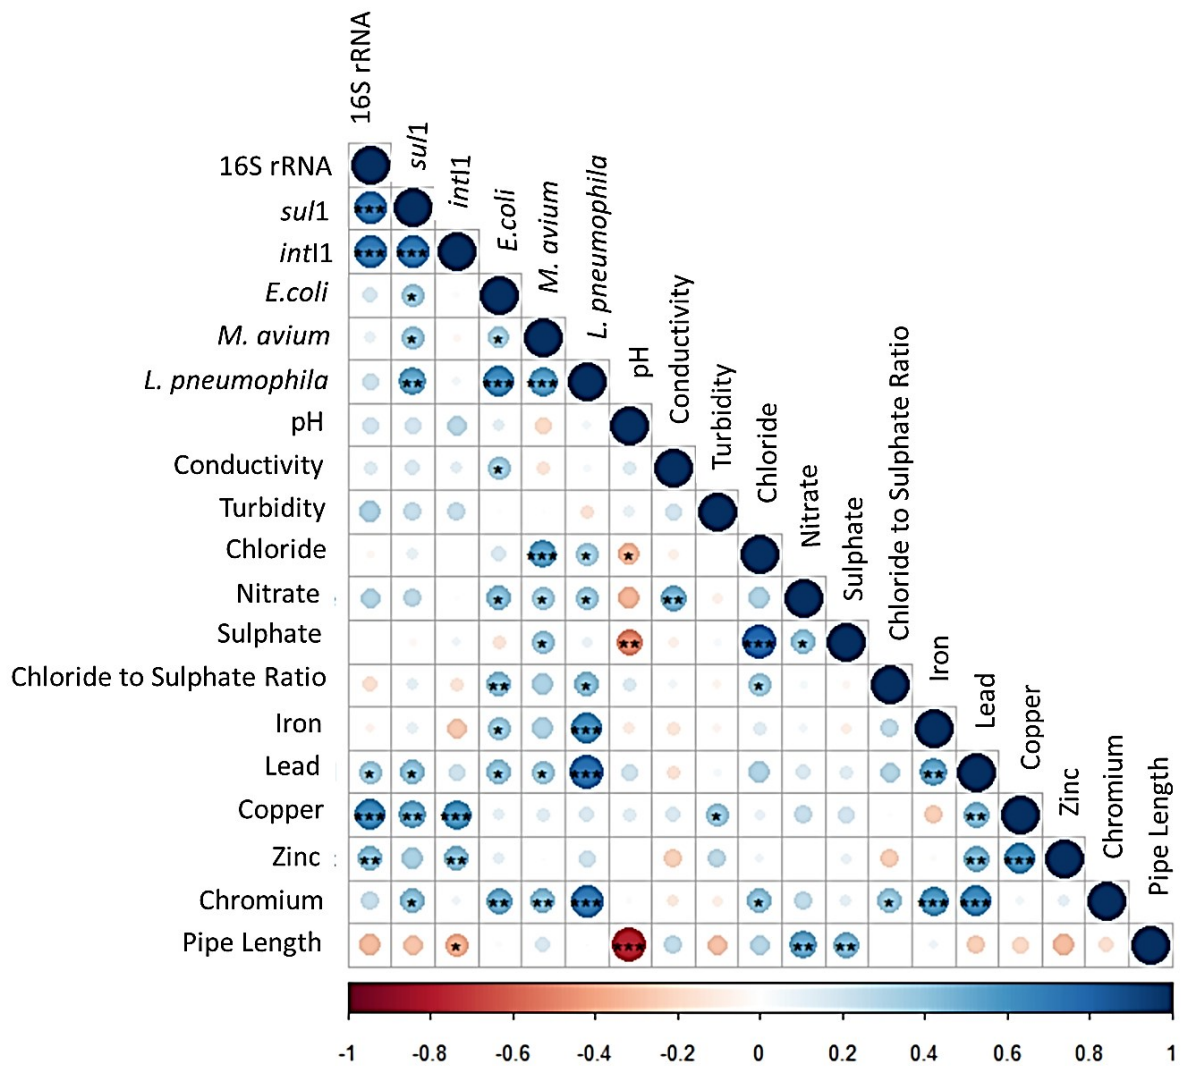

137

138 **Fig. S5.** Correlogram of Spearman's rank correlation coefficients computed between the  
 139 levels of targeted genes and physicochemical parameters in all samples from buildings that  
 140 were 50-60 years old (\*: P-value < 0.05, \*\*: P-value < 0.01, \*\*\*: P-value < 0.001).

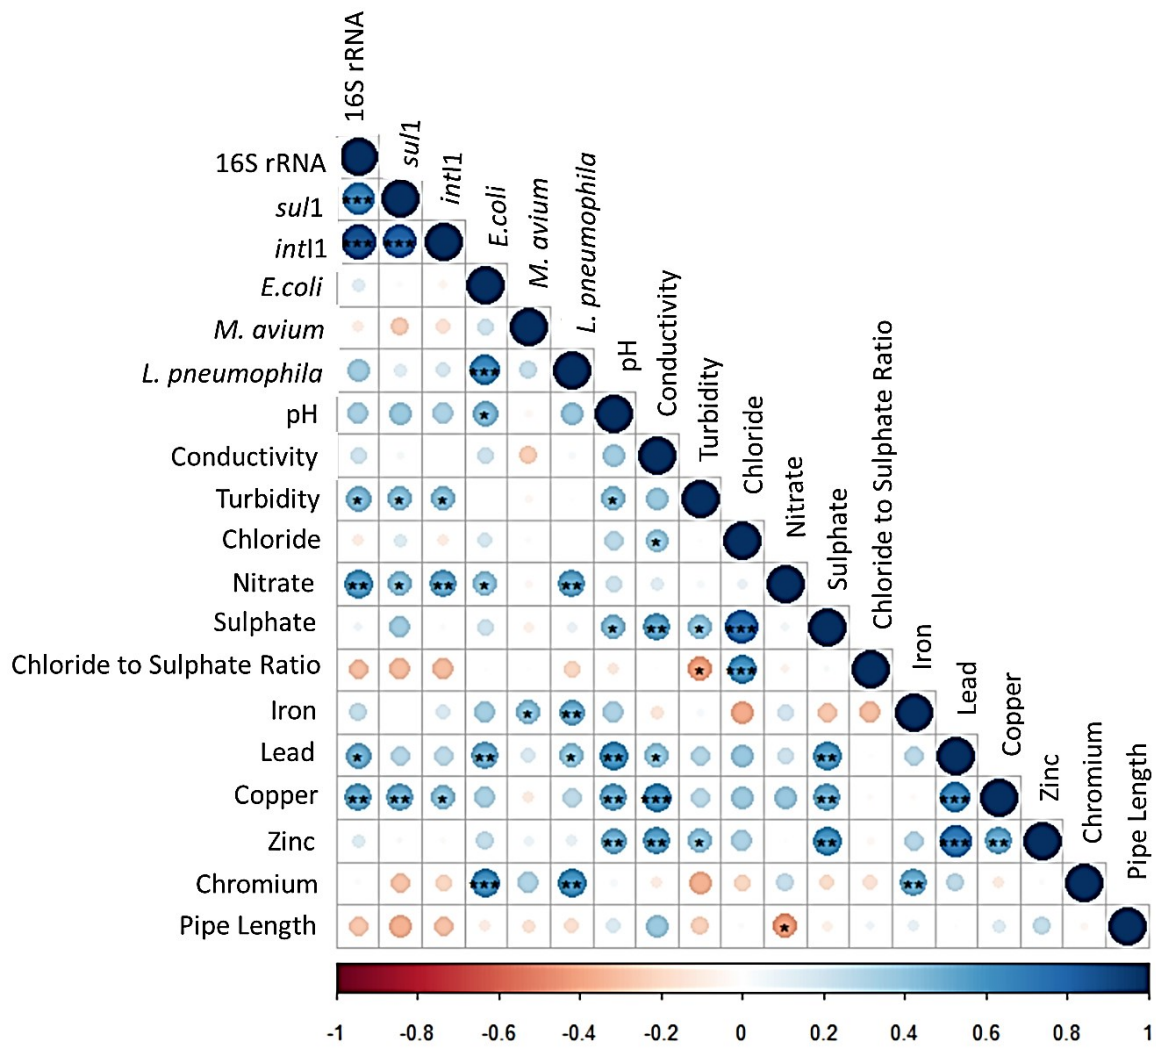

141

142 **Fig. S6.** Correlogram of Spearman's rank correlation coefficients computed between the  
 143 levels of targeted genes and physicochemical parameters in all samples from buildings that  
 144 were <10 years old (\*: P-value < 0.05, \*\*: P-value < 0.01, \*\*\*: P-value < 0.001).



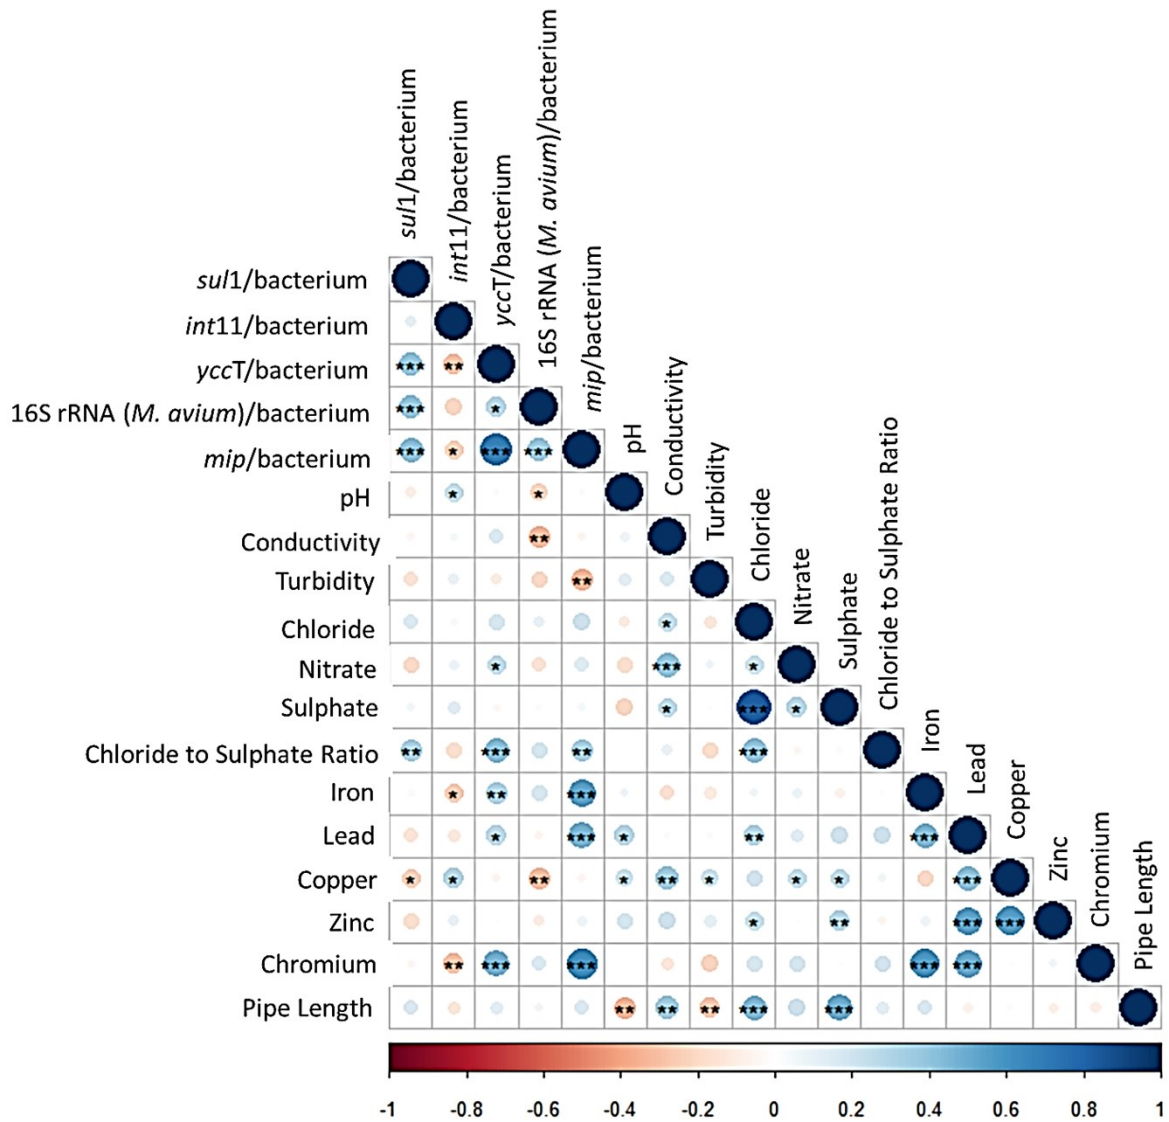

145

146 **Fig. S7. Correlogram between water quality parameters, relative levels of opportunistic**

147 **pathogens, *su1*, and *int11*:** Spearman's rank correlation coefficients between the relative

148 levels of targeted genes and physicochemical parameters for all building samples (n=81)

149 combined (\*: P-value < 0.05, \*\*: P-value < 0.01, \*\*\*: P-value < 0.001).

150

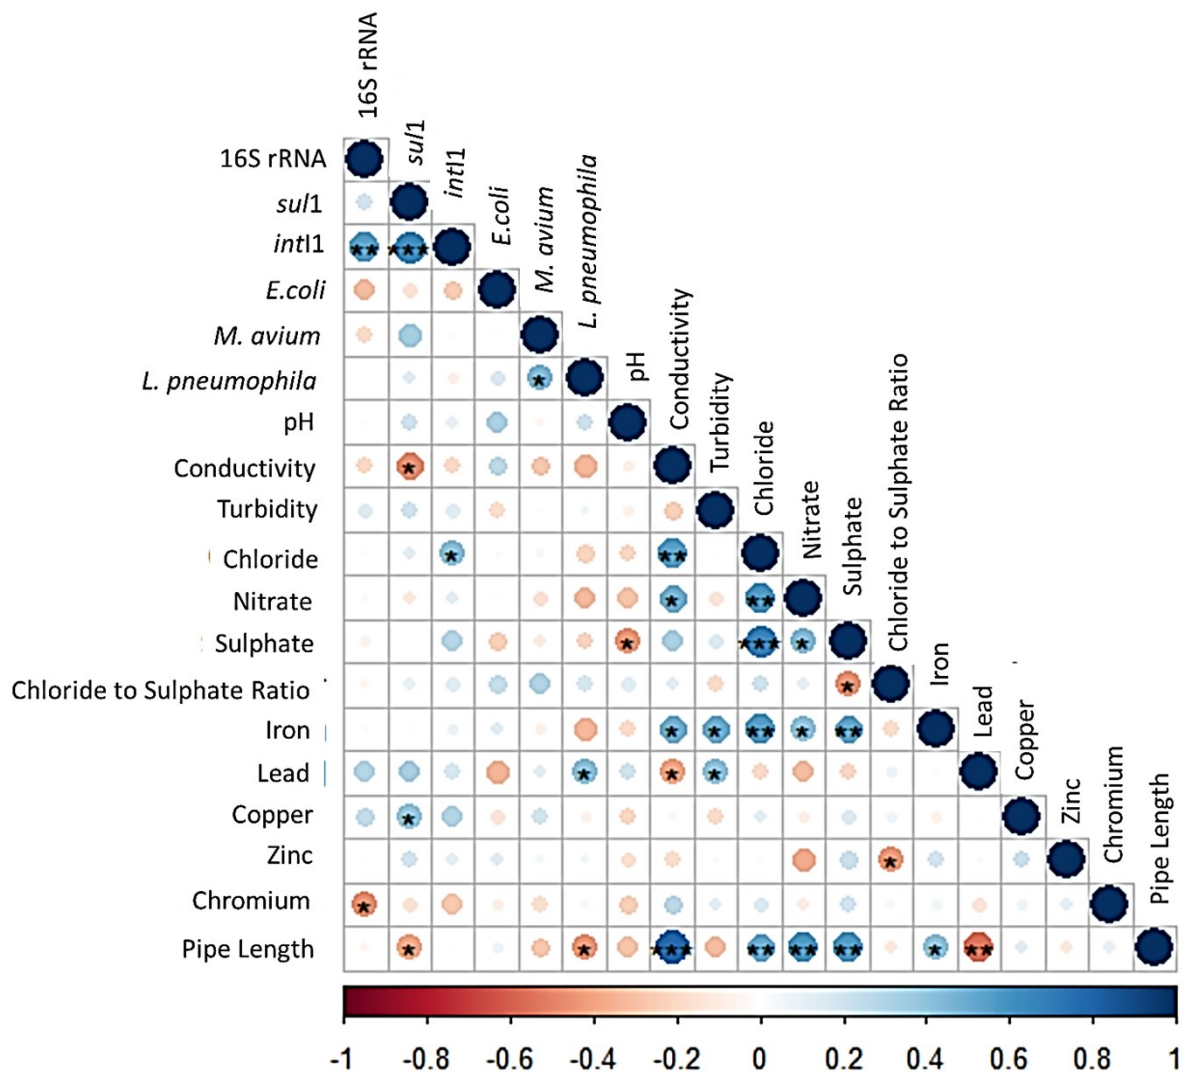

151

152 **Fig. S8.** Correlogram of Spearman's rank correlation coefficients computed between the  
 153 levels of targeted genes and physicochemical parameters in all building samples that were  
 154 collected during summer (\*: P-value < 0.05, \*\*: P-value < 0.01, \*\*\*: P-value < 0.001).

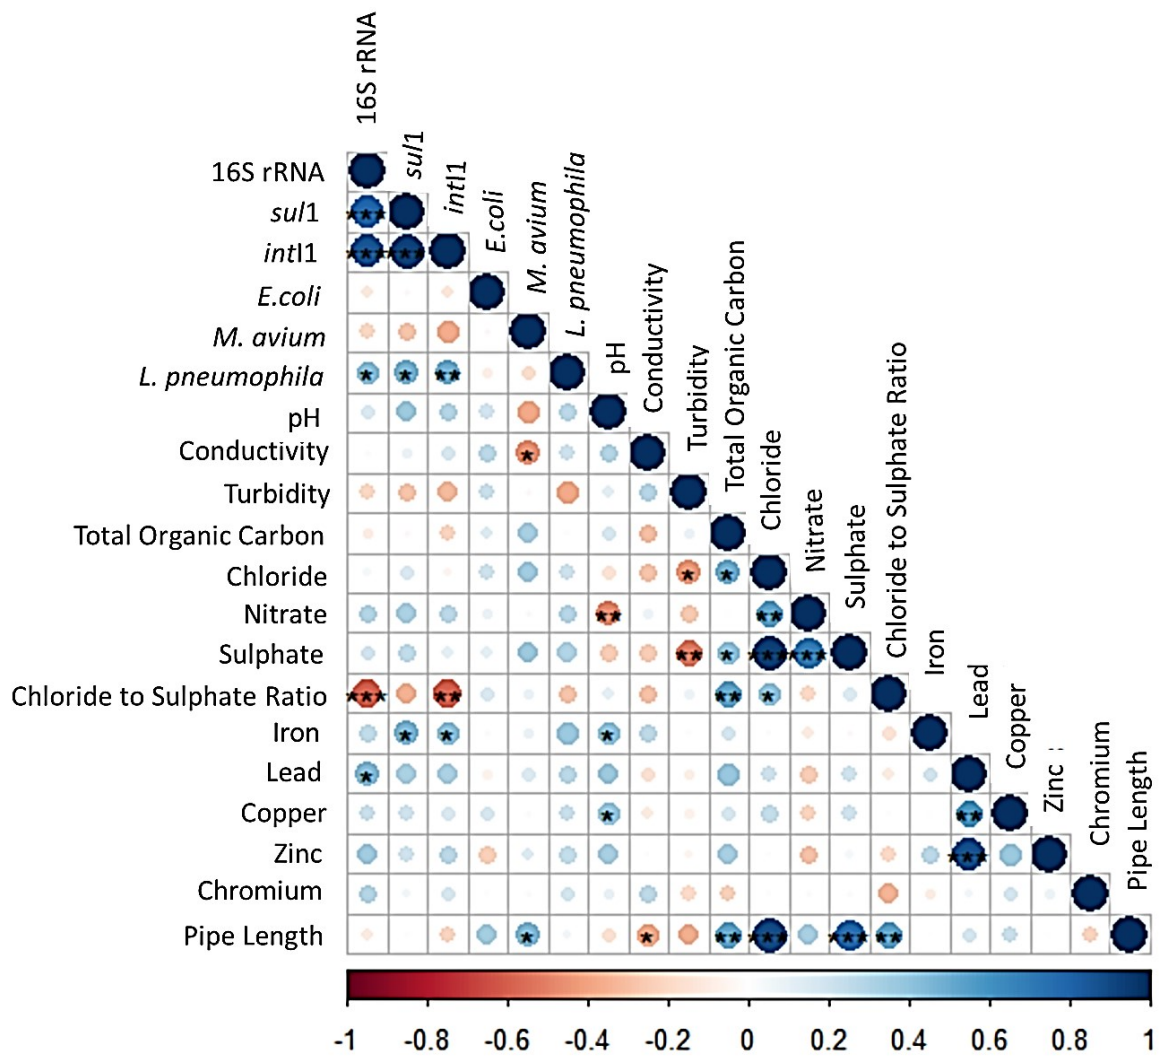

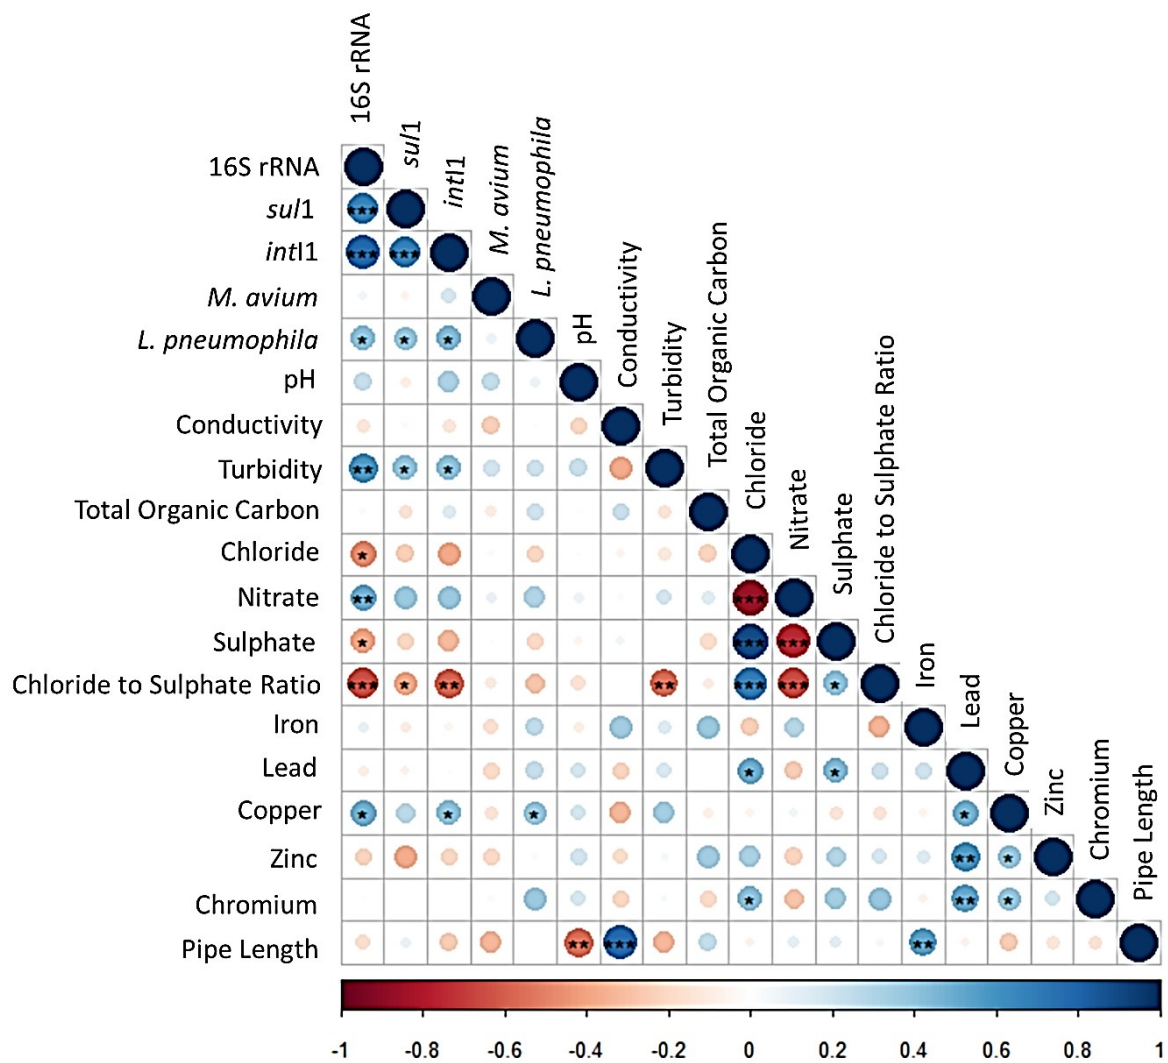

159

160 **Fig. S10.** Correlogram of Spearman's rank correlation coefficients computed between the  
 161 levels of targeted genes and physicochemical parameters in all building samples that were  
 162 collected during winter (\*: P-value < 0.05, \*\*: P-value < 0.01, \*\*\*: P-value < 0.001).

163

164

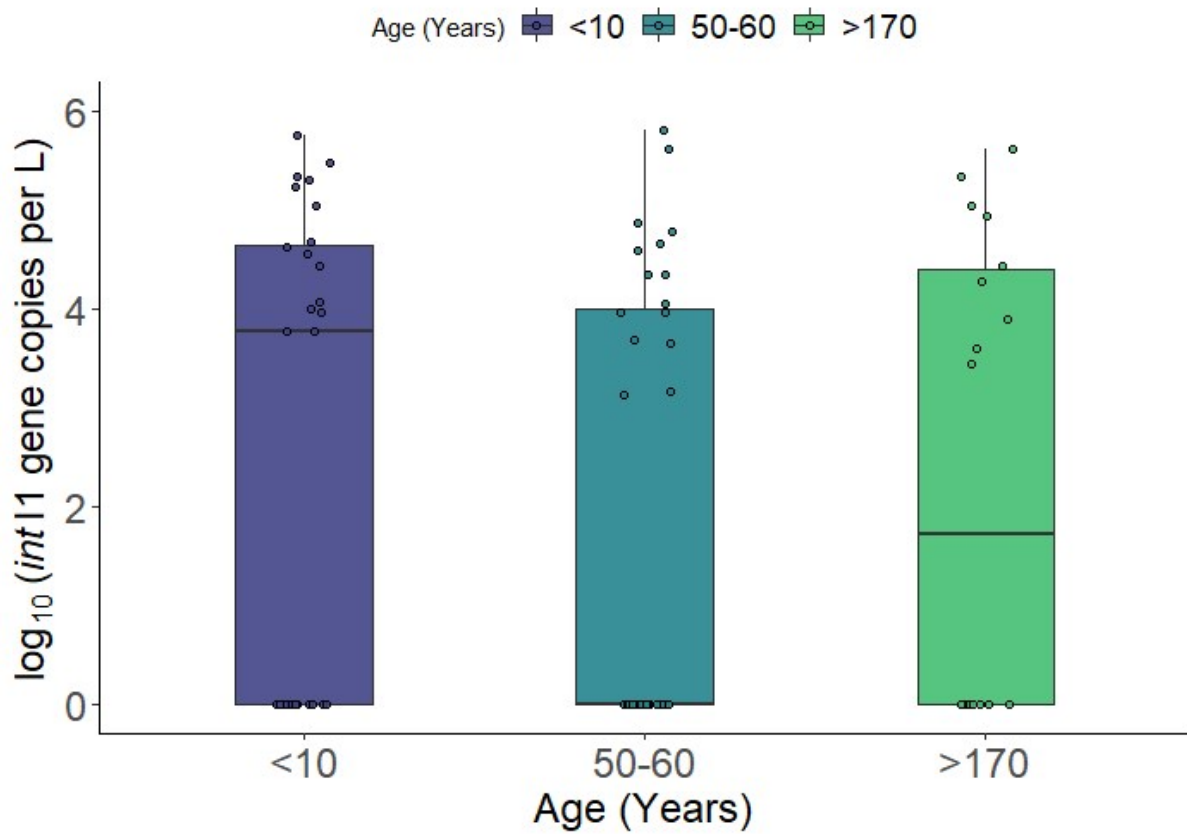

165

166 **Fig. S11. Levels of *intI1* gene copies in building tap water samples:** The y-axis represents  
 167 *intI1* gene copies per L of sampled water on log<sub>10</sub> scale. The x-axis represents the age of the  
 168 buildings these samples were collected from (<10 years, 50-60 years, >170 years).

169

170

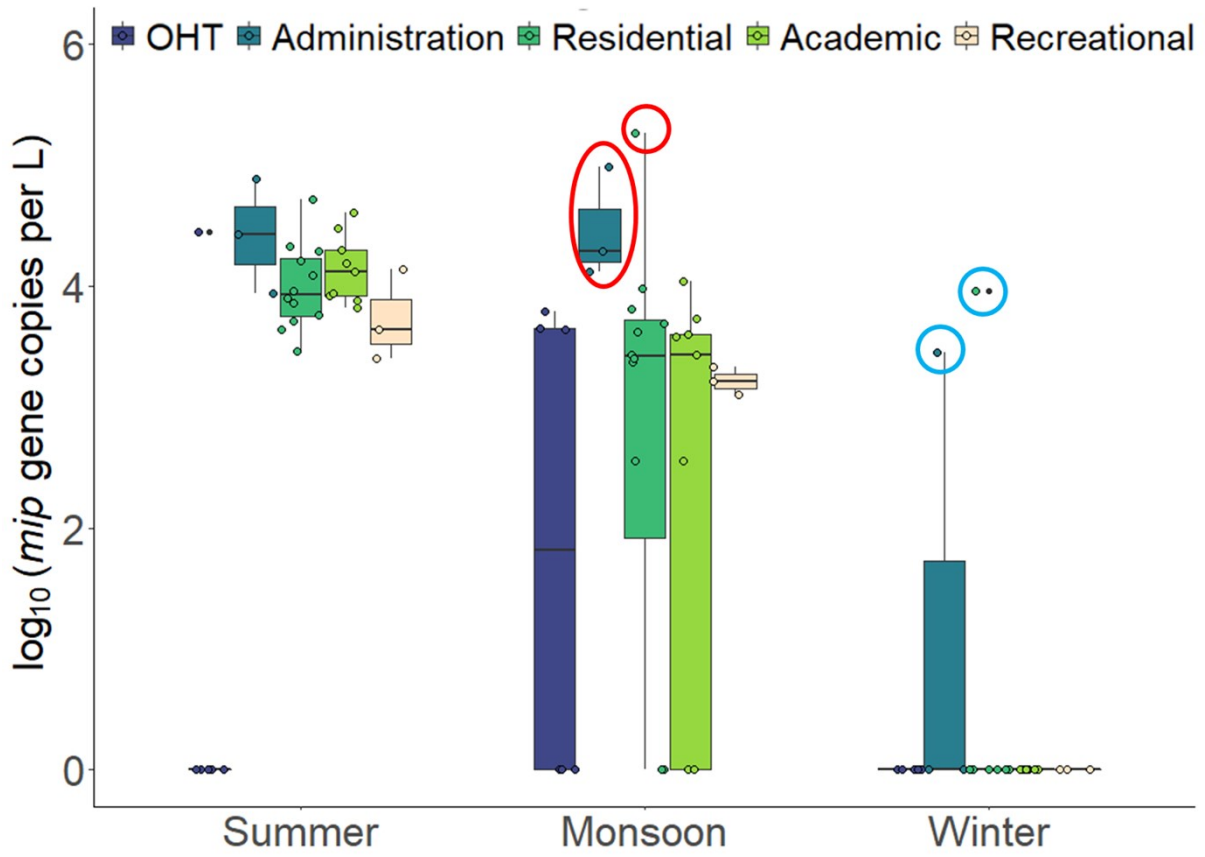

171

172 **Fig. S12. Levels of *mip* gene copies in building tap water samples:** The y-axis represents  
173 *mip* gene copies per L of sampled water on log<sub>10</sub> scale. The x-axis shows the different kinds  
174 of buildings (administration, residential, academics, recreational) that were sampled, resolved  
175 across the three seasons. Red and blue circles show the buildings samples (Resid170-I and  
176 Resid10-I) in monsoon and winter respectively with the higher values relative to OHT  
177 samples.

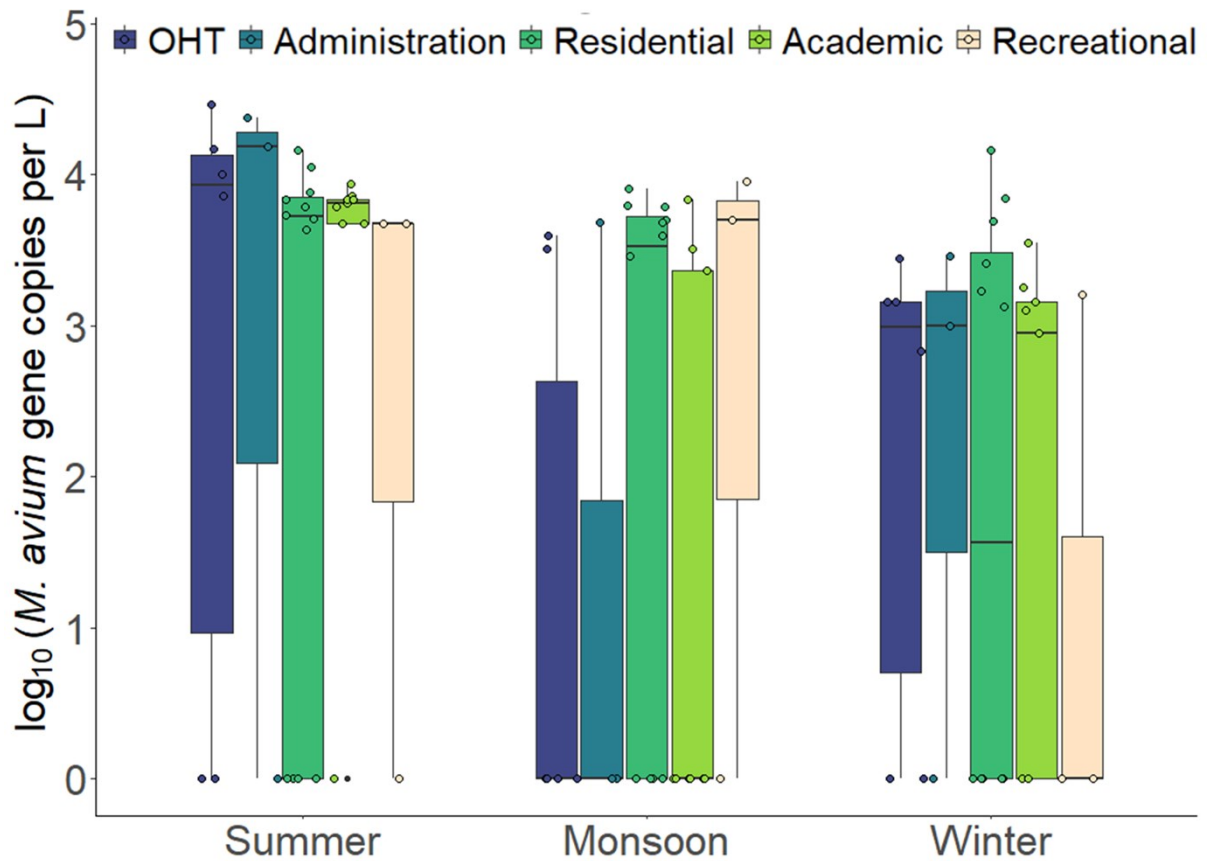

178

179 **Fig. S13. Levels of *M. avium* gene copies in building tap water samples:** The y-axis  
 180 represents gene copies of DNA marker of *M. avium* per L of sampled water on log<sub>10</sub> scale.  
 181 The x-axis represents buildings (n=81) samples that were collected from OHT and different  
 182 buildings (administration, residential, academics, recreational) in three different seasons.

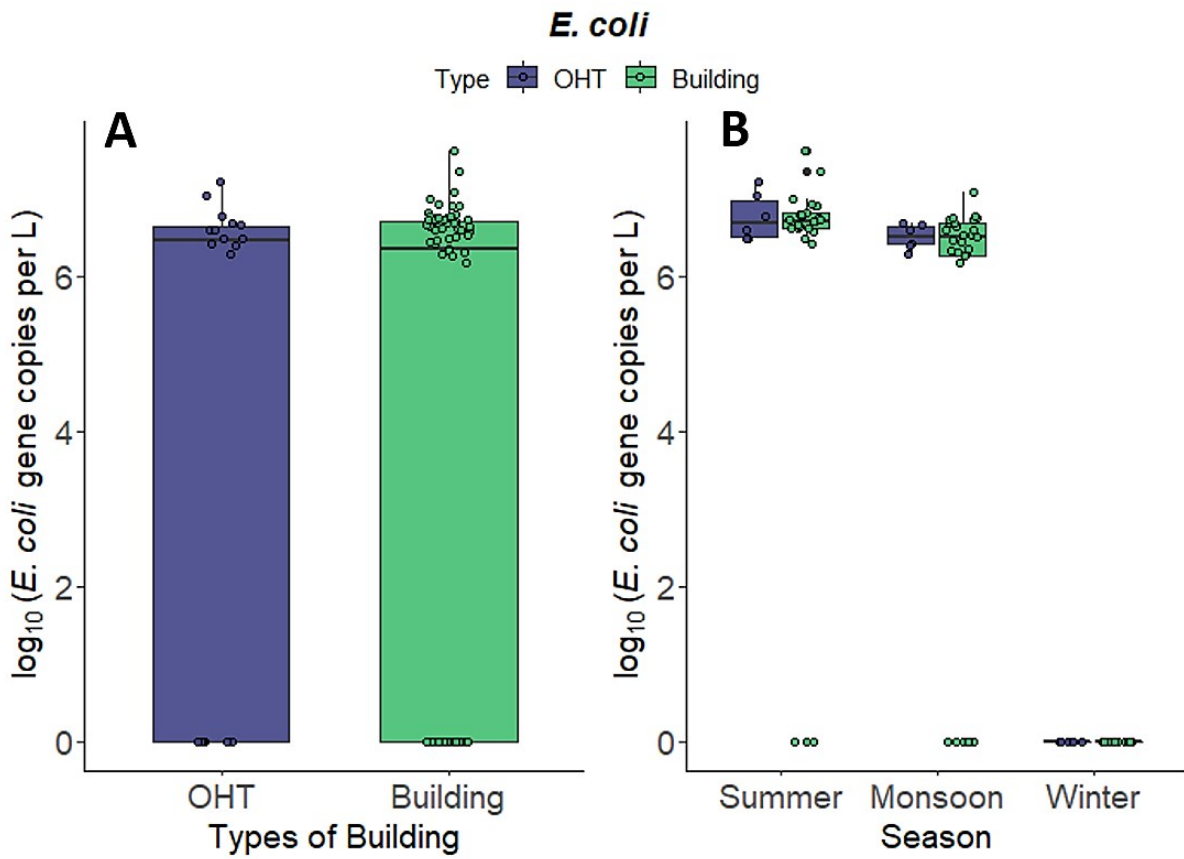

183

184 **Fig. S14. Levels of *E. coli* (*yccT*) gene copies in tap water samples:** The y-axis represents  
 185 *yccT* gene copies per L water on log<sub>10</sub> scale. In **A**, the x-axis represents building (n=81) and  
 186 OHT samples (n=18) that were collected over three seasons. In **B**, the levels of *yccT* gene  
 187 copies in OHT and building samples are resolved for the three different sampling seasons.



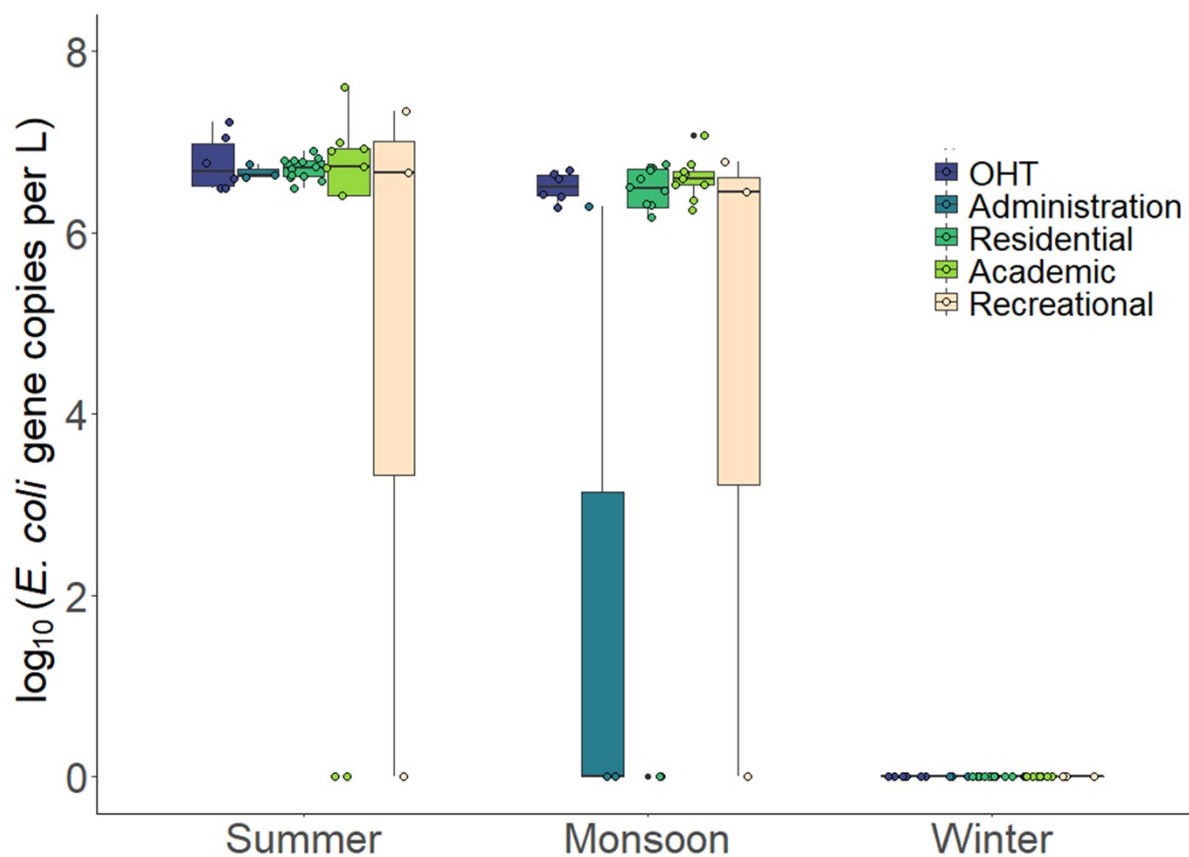

189

190 **Fig. S15. Levels of *E. coli* (*yccT*) gene copies in building tap water samples according to**  
 191 **space utilization:** The y-axis represents *yccT* gene copies per L of sampled water on log10  
 192 scale. The x-axis represents the samples that were collected from OHT (n=18) and different  
 193 buildings (n=81), resolved according to the space utilization (administration, residential,  
 194 academics, recreational) in three sampling seasons).

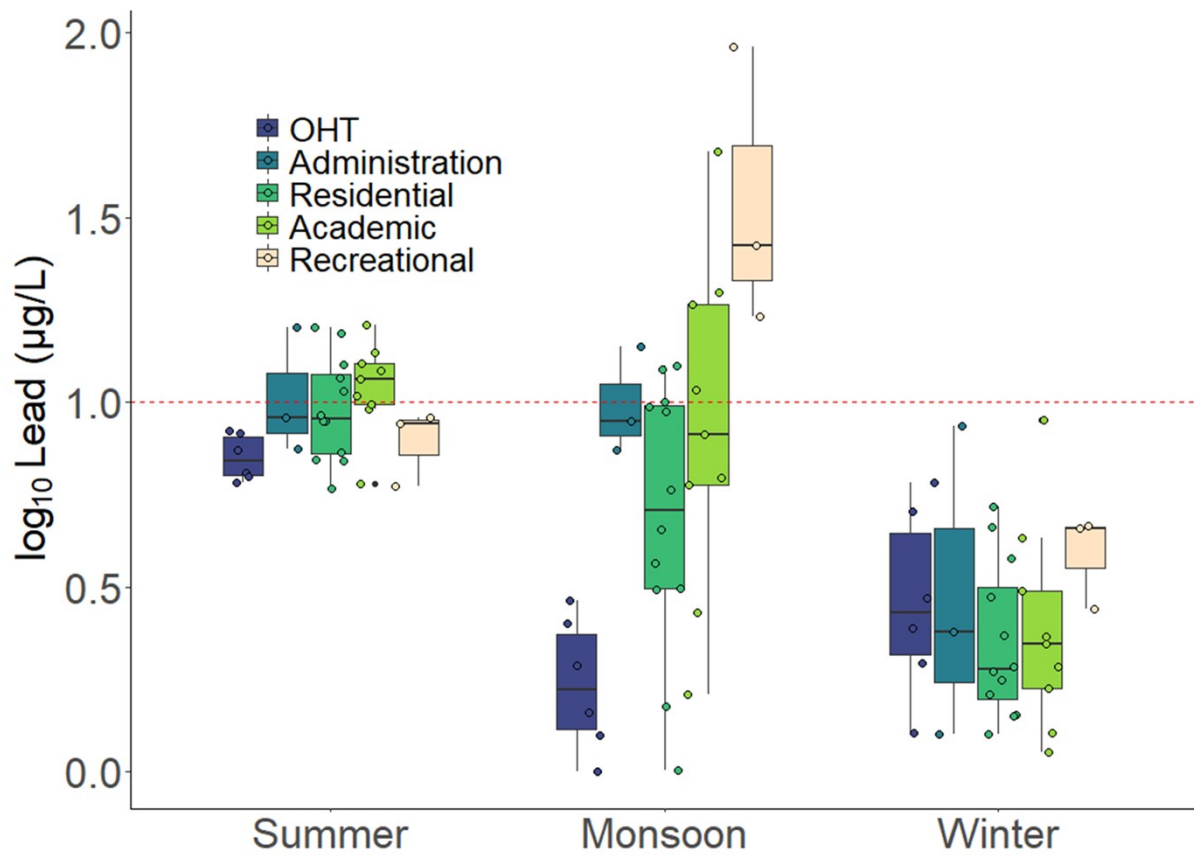

195

196

197 **Fig. S16.** The values of Pb ( $\mu\text{g/L}$ ) in OHT and building samples resolved across the three  
 198 different sampling seasons. Red dashed line represents the WHO<sup>7</sup> guidelines for Pb levels in  
 199 drinking water.

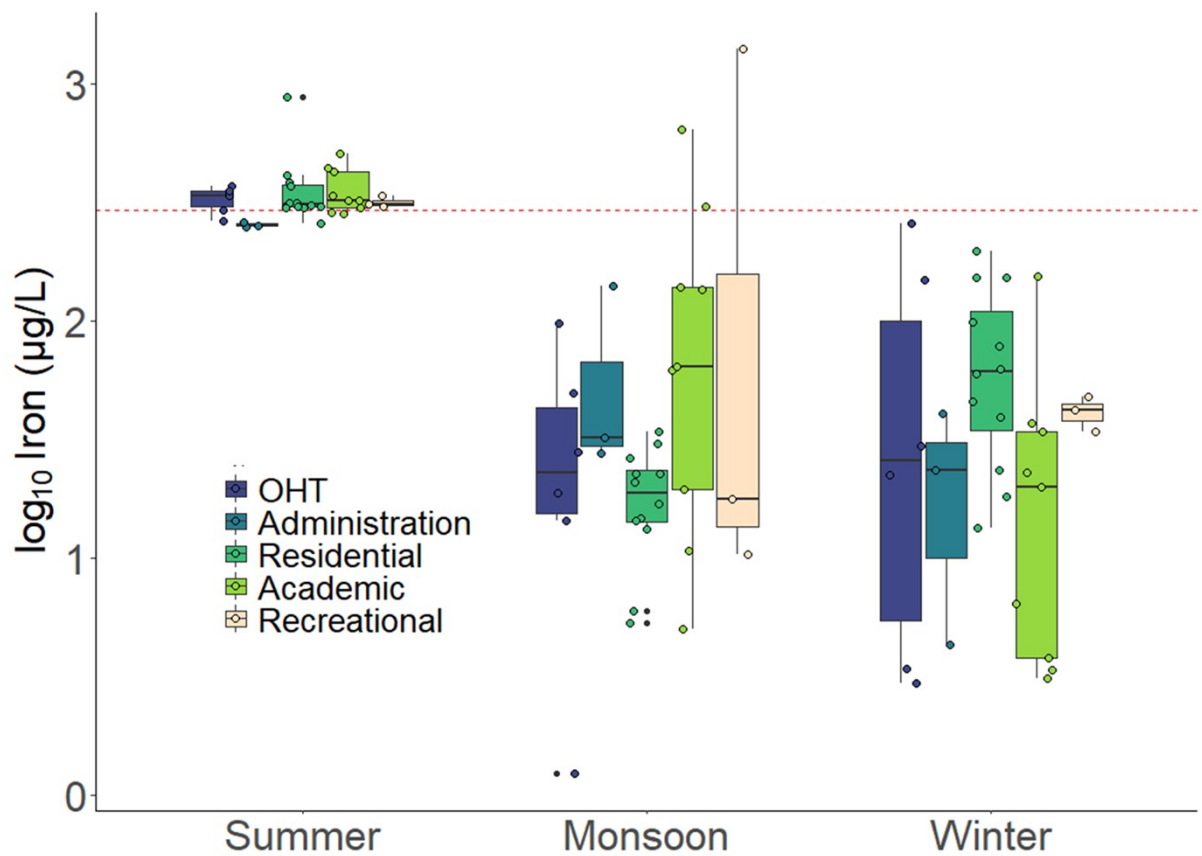

200

201 **Fig. S17.** The values of Fe ( $\mu\text{g/L}$ ) in OHT and building samples resolved across the three  
 202 different sampling seasons. Red line represents the WHO<sup>7</sup> standards for Fe levels in drinking  
 203 water.

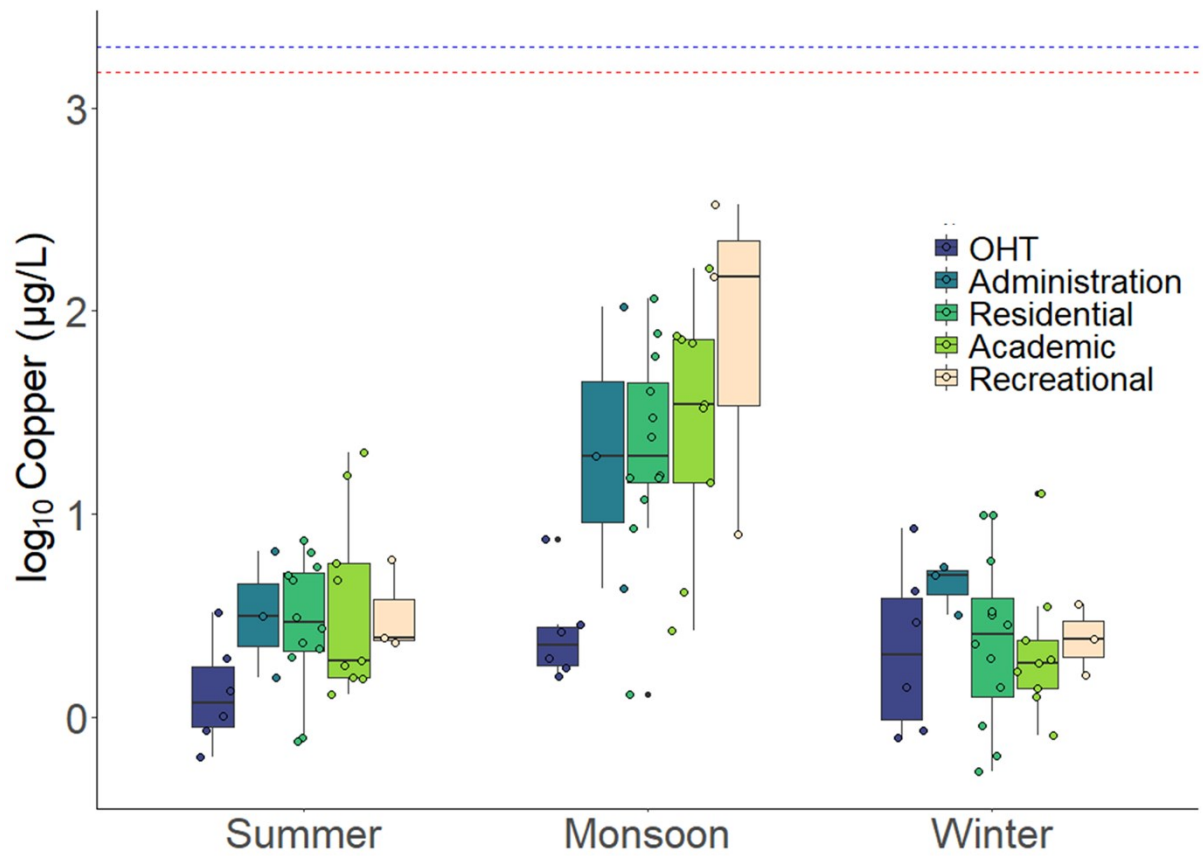

204

205 **Fig. S18.** The values of Cu (µg/L) in OHT and building samples resolved across the three  
 206 different sampling seasons. Red and blue dashed line represent the WHO<sup>7</sup> and BIS<sup>8</sup>  
 207 guidelines for Cu levels in drinking water, respectively.

208

209

210

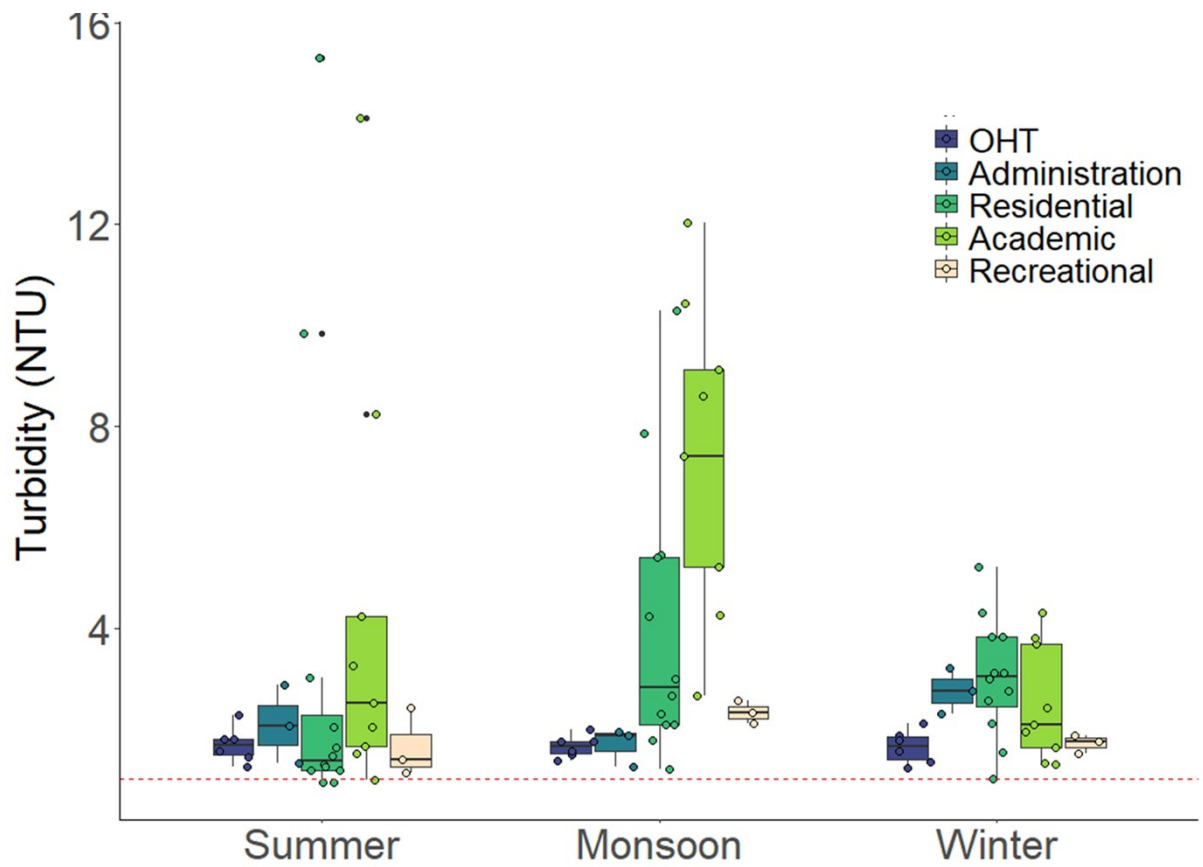

211

212 **Fig. S19.** The turbidity (NTU) values of OHT and building samples resolved across the three  
 213 different sampling seasons. Red dashed line represents the WHO (<1 NTU) <sup>7</sup> for turbidity in  
 214 drinking water.

215

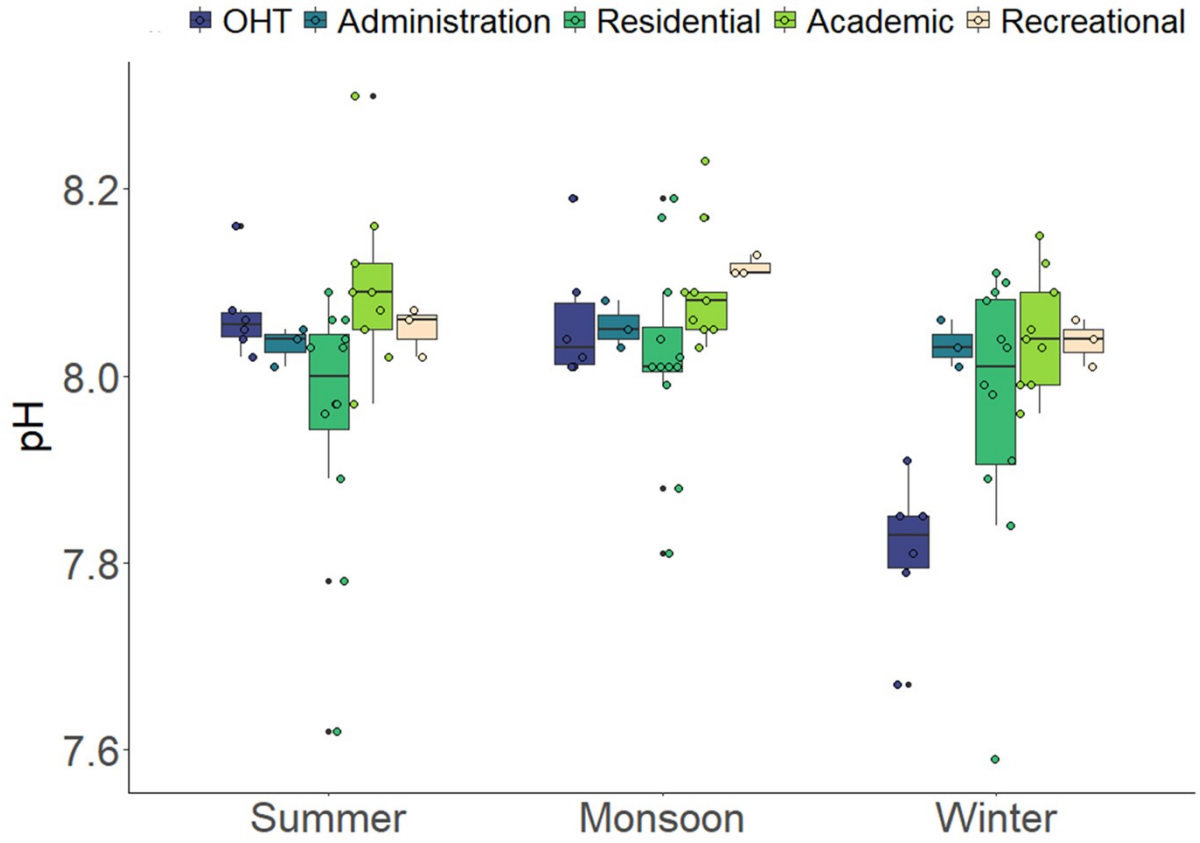

216

217 **Fig. S20.** The pH values of the OHT and building samples resolved across the three different  
 218 sampling seasons.

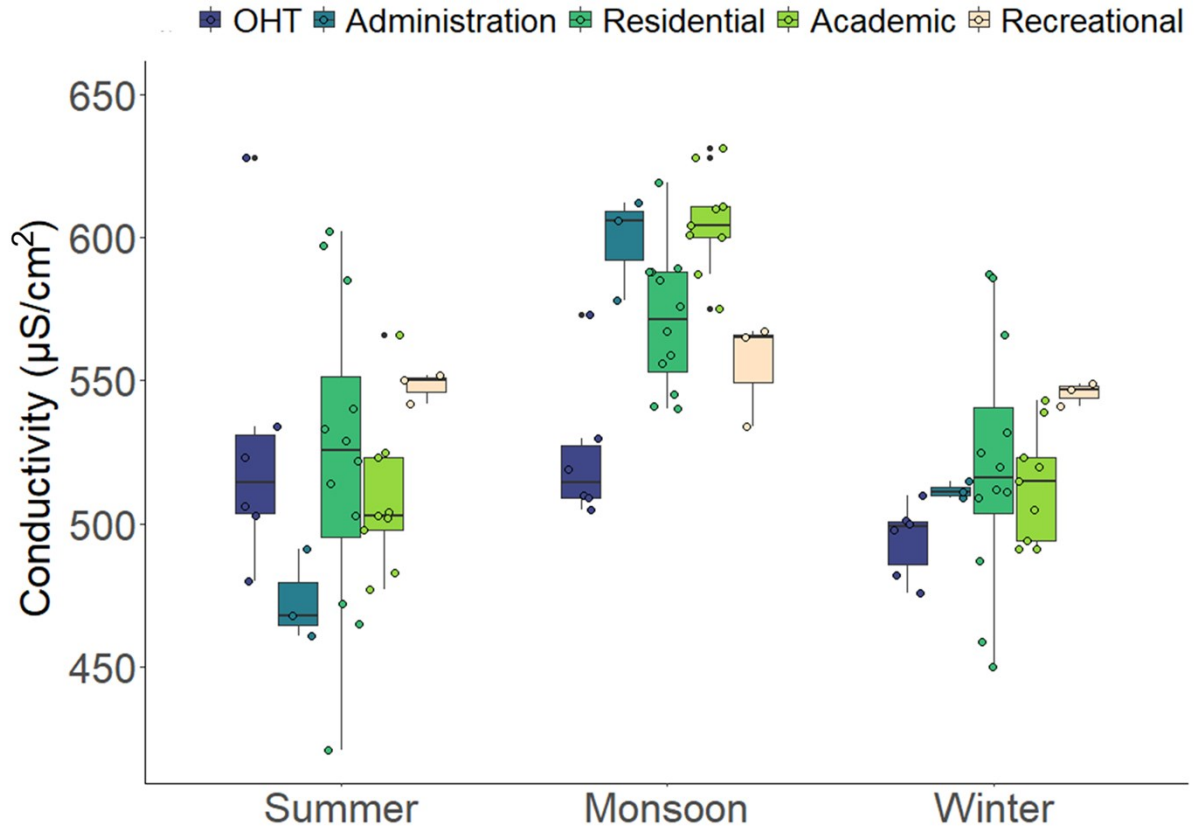

219

220 **Fig. S21.** The values of conductivity ( $\mu\text{S}/\text{cm}^2$ ) of OHT and building samples resolved across  
 221 the three different sampling seasons.

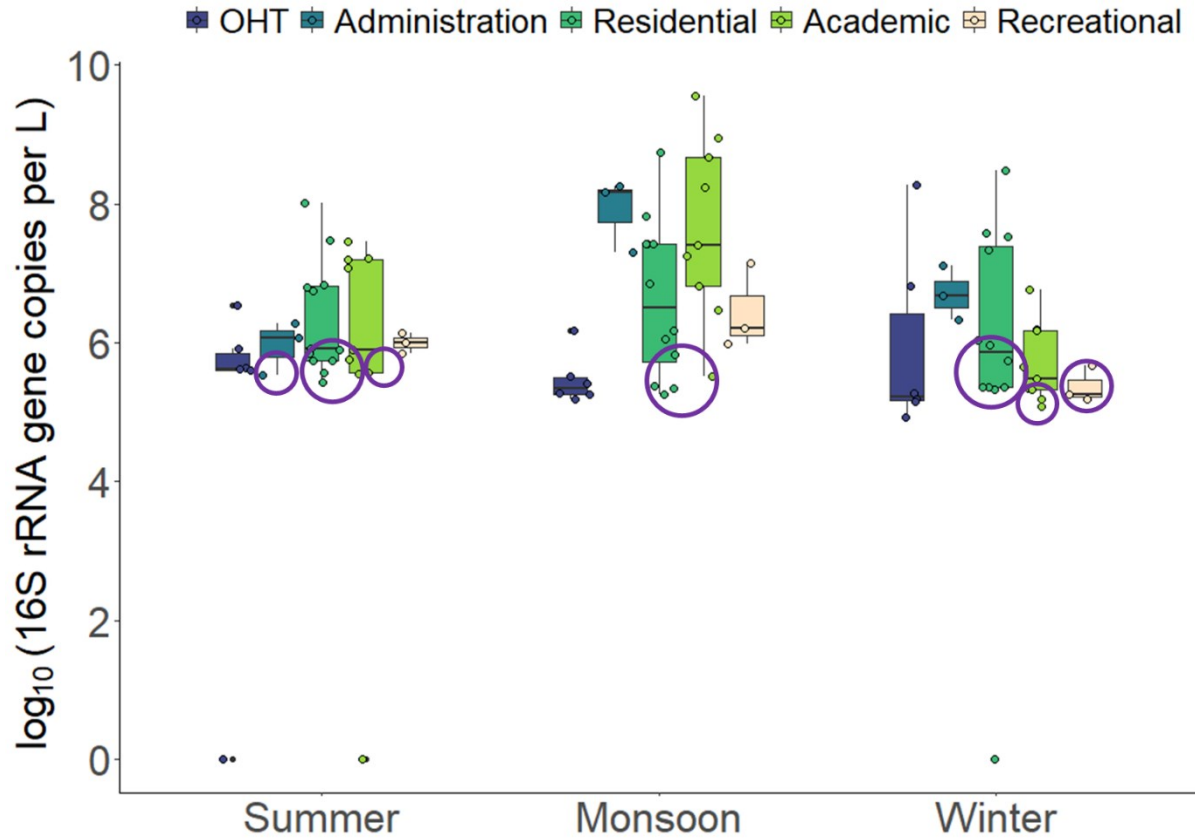

222

223 **Fig. S22. Building samples, where the levels of 16S rRNA gene copies remained**  
 224 **comparable to that in OHT samples.** The y-axis represents 16S rRNA gene copies per L of  
 225 sampled water on log<sub>10</sub> scale. Purple circles represent the samples which did not have  
 226 significant increase relative to OHT samples in different seasons.



227

228 **References.**

- 229 1 M. T. Suzuki, L. T. Taylor and E. F. DeLong, Quantitative analysis of small-subunit  
230 rRNA genes in mixed microbial populations via 5'-nuclease assays, *Appl. Environ.*  
231 *Microbiol.*, 2000, **66**, 4605–4614.
- 232 2 M. F. Lee, C. F. Peng, H. J. Hsu and H. S. Toh, Use of inverse PCR for analysis of  
233 Class 1 Integrons carrying an unusual 3' conserved segment structure, *Antimicrob.*  
234 *Agents Chemother.*, 2011, **55**, 943–945.
- 235 3 M. Wajid, M. K. Saleemi, Y. Sarwar and A. Ali, Detection and characterization of  
236 multidrug-resistant *Salmonella enterica* serovar infantis as an emerging threat in  
237 poultry farms of Faisalabad, Pakistan, *J. Appl. Microbiol.*, 2019, **127**, 248–261.
- 238 4 J. Chen, Z. Yu, F. C. Michel, T. Wittum and M. Morrison, Development and  
239 application of real-time PCR assays for quantification of *erm* genes conferring  
240 resistance to macrolides-lincosamides-streptogramin B in livestock manure and  
241 manure management systems, *Appl. Environ. Microbiol.*, 2007, **73**, 4407–4416.
- 242 5 H. Wang, M. Edwards, J. O. Falkinham and A. Pruden, Occurrence of *Legionella spp.*,  
243 *Mycobacterium spp.*, *Pseudomonas aeruginosa*, and Amoeba hosts in two  
244 chloraminated drinking water distribution systems, *Appl. Environ. Microbiol.*, 2012,  
245 **78**, 6285–6294.
- 246 6 N. Hembach, F. Schmid, J. Alexander, C. Hiller, E. T. Rogall and T. Schwartz,  
247 Occurrence of the *mcr-1* colistin resistance gene and other clinically relevant antibiotic  
248 resistance genes in microbial populations at different municipal wastewater treatment  
249 plants in Germany, *Front. Microbiol.*, 2017, **8**, 1–11.

- 250 7 World Health Organisation, *Guidelines for drinking-water quality, 4th edition: 1st*  
251 *addendum*, 2017.
- 252 8 Bureau of Indian Standards, *Indian Standard: Drinking water- Specification (second*  
253 *revision)*, 2012.
- 254
